# Supplementary material for: Disease burden of primary biliary cholangitis and associated pruritus based on a cross-sectional US claims analysis
Source: PubMed Central journal article supplement — BMJ Open Gastroenterol. 2022 Aug 16;9(1):e000857. doi: 10.1136/bmjgast-2021-000857 (PMC9386220; doi:10.1136/bmjgast-2021-000857), 2022-08-16
Supplement: bmjgast-2021-000857supp001.pdf [file bmjgast-2021-000857supp001.pdf]

**PBC codes [ICD-10 Code]**

| <b>Code</b> | <b>Description</b>        |
|-------------|---------------------------|
| K74.3       | Primary biliary cirrhosis |

**Fatigue codes [ICD-10 Code]**

| <b>Code</b> | <b>Description</b>           |
|-------------|------------------------------|
| R53.1       | Weakness                     |
| R53.81      | Other malaise                |
| R53.82      | Chronic fatigue, unspecified |
| R53.83      | Other fatigue                |

**SLE codes [ICD-10 Code]**

| <b>Code</b> | <b>Description</b>                                                    |
|-------------|-----------------------------------------------------------------------|
| M32.0       | Drug-induced systemic lupus erythematosus                             |
| M32.10      | Systemic lupus erythematosus, organ or system involvement unspecified |
| M32.11      | Endocarditis in systemic lupus erythematosus                          |
| M32.12      | Pericarditis in systemic lupus erythematosus                          |
| M32.13      | Lung involvement in systemic lupus erythematosus                      |
| M32.14      | Glomerular disease in systemic lupus erythematosus                    |
| M32.15      | Tubulo-interstitial nephropathy in systemic lupus erythematosus       |
| M32.19      | Other organ or system involvement in systemic lupus erythematosus     |
| M32.8       | Other forms of systemic lupus erythematosus                           |
| M32.9       | Systemic lupus erythematosus, unspecified                             |

**Autoimmune hepatitis codes [ICD-10 Code]**

| <b>Code</b> | <b>Description</b>   |
|-------------|----------------------|
| K75.4       | Autoimmune hepatitis |

## Diabetes (Type II) codes [ICD-10 Code]

E11.\* only.

| Code     | Description                                                                                                         |
|----------|---------------------------------------------------------------------------------------------------------------------|
| E11.00   | Type 2 diabetes mellitus with hyperosmolarity without nonketotic hyperglycemic-hyperosmolar coma (NKHHC)            |
| E11.01   | Type 2 diabetes mellitus with hyperosmolarity with coma                                                             |
| E11.10   | Type 2 diabetes mellitus with ketoacidosis without coma                                                             |
| E11.11   | Type 2 diabetes mellitus with ketoacidosis with coma                                                                |
| E11.21   | Type 2 diabetes mellitus with diabetic nephropathy                                                                  |
| E11.22   | Type 2 diabetes mellitus with diabetic chronic kidney disease                                                       |
| E11.29   | Type 2 diabetes mellitus with other diabetic kidney complication                                                    |
| E11.311  | Type 2 diabetes mellitus with unspecified diabetic retinopathy with macular edema                                   |
| E11.319  | Type 2 diabetes mellitus with unspecified diabetic retinopathy without macular edema                                |
| E11.321  | Type 2 diabetes mellitus with mild nonproliferative diabetic retinopathy with macular edema                         |
| E11.3211 | Type 2 diabetes mellitus with mild nonproliferative diabetic retinopathy with macular edema, right eye              |
| E11.3212 | Type 2 diabetes mellitus with mild nonproliferative diabetic retinopathy with macular edema, left eye               |
| E11.3213 | Type 2 diabetes mellitus with mild nonproliferative diabetic retinopathy with macular edema, bilateral              |
| E11.3219 | Type 2 diabetes mellitus with mild nonproliferative diabetic retinopathy with macular edema, unspecified eye        |
| E11.329  | Type 2 diabetes mellitus with mild nonproliferative diabetic retinopathy without macular edema                      |
| E11.3291 | Type 2 diabetes mellitus with mild nonproliferative diabetic retinopathy without macular edema, right eye           |
| E11.3292 | Type 2 diabetes mellitus with mild nonproliferative diabetic retinopathy without macular edema, left eye            |
| E11.3293 | Type 2 diabetes mellitus with mild nonproliferative diabetic retinopathy without macular edema, bilateral           |
| E11.3299 | Type 2 diabetes mellitus with mild nonproliferative diabetic retinopathy without macular edema, unspecified eye     |
| E11.331  | Type 2 diabetes mellitus with moderate nonproliferative diabetic retinopathy with macular edema                     |
| E11.3311 | Type 2 diabetes mellitus with moderate nonproliferative diabetic retinopathy with macular edema, right eye          |
| E11.3312 | Type 2 diabetes mellitus with moderate nonproliferative diabetic retinopathy with macular edema, left eye           |
| E11.3313 | Type 2 diabetes mellitus with moderate nonproliferative diabetic retinopathy with macular edema, bilateral          |
| E11.3319 | Type 2 diabetes mellitus with moderate nonproliferative diabetic retinopathy with macular edema, unspecified eye    |
| E11.339  | Type 2 diabetes mellitus with moderate nonproliferative diabetic retinopathy without macular edema                  |
| E11.3391 | Type 2 diabetes mellitus with moderate nonproliferative diabetic retinopathy without macular edema, right eye       |
| E11.3392 | Type 2 diabetes mellitus with moderate nonproliferative diabetic retinopathy without macular edema, left eye        |
| E11.3393 | Type 2 diabetes mellitus with moderate nonproliferative diabetic retinopathy without macular edema, bilateral       |
| E11.3399 | Type 2 diabetes mellitus with moderate nonproliferative diabetic retinopathy without macular edema, unspecified eye |
| E11.341  | Type 2 diabetes mellitus with severe nonproliferative diabetic retinopathy with macular edema                       |

- E11.3411 Type 2 diabetes mellitus with severe nonproliferative diabetic retinopathy with macular edema, right eye
- E11.3412 Type 2 diabetes mellitus with severe nonproliferative diabetic retinopathy with macular edema, left eye
- E11.3413 Type 2 diabetes mellitus with severe nonproliferative diabetic retinopathy with macular edema, bilateral
- E11.3419 Type 2 diabetes mellitus with severe nonproliferative diabetic retinopathy with macular edema, unspecified eye
- E11.349 Type 2 diabetes mellitus with severe nonproliferative diabetic retinopathy without macular edema
- E11.3491 Type 2 diabetes mellitus with severe nonproliferative diabetic retinopathy without macular edema, right eye
- E11.3492 Type 2 diabetes mellitus with severe nonproliferative diabetic retinopathy without macular edema, left eye
- E11.3493 Type 2 diabetes mellitus with severe nonproliferative diabetic retinopathy without macular edema, bilateral
- E11.3499 Type 2 diabetes mellitus with severe nonproliferative diabetic retinopathy without macular edema, unspecified eye
- E11.351 Type 2 diabetes mellitus with proliferative diabetic retinopathy with macular edema
- E11.3511 Type 2 diabetes mellitus with proliferative diabetic retinopathy with macular edema, right eye
- E11.3512 Type 2 diabetes mellitus with proliferative diabetic retinopathy with macular edema, left eye
- E11.3513 Type 2 diabetes mellitus with proliferative diabetic retinopathy with macular edema, bilateral
- E11.3519 Type 2 diabetes mellitus with proliferative diabetic retinopathy with macular edema, unspecified eye
- E11.3521 Type 2 diabetes mellitus with proliferative diabetic retinopathy with traction retinal detachment involving the macula, right eye
- E11.3522 Type 2 diabetes mellitus with proliferative diabetic retinopathy with traction retinal detachment involving the macula, left eye
- E11.3523 Type 2 diabetes mellitus with proliferative diabetic retinopathy with traction retinal detachment involving the macula, bilateral
- E11.3529 Type 2 diabetes mellitus with proliferative diabetic retinopathy with traction retinal detachment involving the macula, unspecified eye
- E11.3531 Type 2 diabetes mellitus with proliferative diabetic retinopathy with traction retinal detachment not involving the macula, right eye
- E11.3532 Type 2 diabetes mellitus with proliferative diabetic retinopathy with traction retinal detachment not involving the macula, left eye
- E11.3533 Type 2 diabetes mellitus with proliferative diabetic retinopathy with traction retinal detachment not involving the macula, bilateral
- E11.3539 Type 2 diabetes mellitus with proliferative diabetic retinopathy with traction retinal detachment not involving the macula, unspecified eye
- E11.3541 Type 2 diabetes mellitus with proliferative diabetic retinopathy with combined traction retinal detachment and rhegmatogenous retinal detachment, right eye
- E11.3542 Type 2 diabetes mellitus with proliferative diabetic retinopathy with combined traction retinal detachment and rhegmatogenous retinal detachment, left eye
- E11.3543 Type 2 diabetes mellitus with proliferative diabetic retinopathy with combined traction retinal detachment and rhegmatogenous retinal detachment, bilateral
- E11.3549 Type 2 diabetes mellitus with proliferative diabetic retinopathy with combined traction retinal detachment and rhegmatogenous retinal detachment, unspecified eye
- E11.3551 Type 2 diabetes mellitus with stable proliferative diabetic retinopathy, right eye
- E11.3552 Type 2 diabetes mellitus with stable proliferative diabetic retinopathy, left eye
- E11.3553 Type 2 diabetes mellitus with stable proliferative diabetic retinopathy, bilateral
- E11.3559 Type 2 diabetes mellitus with stable proliferative diabetic retinopathy, unspecified eye
- E11.359 Type 2 diabetes mellitus with proliferative diabetic retinopathy without macular edema
- E11.3591 Type 2 diabetes mellitus with proliferative diabetic retinopathy without macular edema, right eye
- E11.3592 Type 2 diabetes mellitus with proliferative diabetic retinopathy without macular edema, left eye
- E11.3593 Type 2 diabetes mellitus with proliferative diabetic retinopathy without macular edema, bilateral

|          |                                                                                                         |
|----------|---------------------------------------------------------------------------------------------------------|
| E11.3599 | Type 2 diabetes mellitus with proliferative diabetic retinopathy without macular edema, unspecified eye |
| E11.36   | Type 2 diabetes mellitus with diabetic cataract                                                         |
| E11.37X1 | Type 2 diabetes mellitus with diabetic macular edema, resolved following treatment, right eye           |
| E11.37X2 | Type 2 diabetes mellitus with diabetic macular edema, resolved following treatment, left eye            |
| E11.37X3 | Type 2 diabetes mellitus with diabetic macular edema, resolved following treatment, bilateral           |
| E11.37X9 | Type 2 diabetes mellitus with diabetic macular edema, resolved following treatment, unspecified eye     |
| E11.39   | Type 2 diabetes mellitus with other diabetic ophthalmic complication                                    |
| E11.40   | Type 2 diabetes mellitus with diabetic neuropathy, unspecified                                          |
| E11.41   | Type 2 diabetes mellitus with diabetic mononeuropathy                                                   |
| E11.42   | Type 2 diabetes mellitus with diabetic polyneuropathy                                                   |
| E11.43   | Type 2 diabetes mellitus with diabetic autonomic (poly)neuropathy                                       |
| E11.44   | Type 2 diabetes mellitus with diabetic amyotrophy                                                       |
| E11.49   | Type 2 diabetes mellitus with other diabetic neurological complication                                  |
| E11.51   | Type 2 diabetes mellitus with diabetic peripheral angiopathy without gangrene                           |
| E11.52   | Type 2 diabetes mellitus with diabetic peripheral angiopathy with gangrene                              |
| E11.59   | Type 2 diabetes mellitus with other circulatory complications                                           |
| E11.610  | Type 2 diabetes mellitus with diabetic neuropathic arthropathy                                          |
| E11.618  | Type 2 diabetes mellitus with other diabetic arthropathy                                                |
| E11.620  | Type 2 diabetes mellitus with diabetic dermatitis                                                       |
| E11.621  | Type 2 diabetes mellitus with foot ulcer                                                                |
| E11.622  | Type 2 diabetes mellitus with other skin ulcer                                                          |
| E11.628  | Type 2 diabetes mellitus with other skin complications                                                  |
| E11.630  | Type 2 diabetes mellitus with periodontal disease                                                       |
| E11.638  | Type 2 diabetes mellitus with other oral complications                                                  |
| E11.641  | Type 2 diabetes mellitus with hypoglycemia with coma                                                    |
| E11.649  | Type 2 diabetes mellitus with hypoglycemia without coma                                                 |
| E11.65   | Type 2 diabetes mellitus with hyperglycemia                                                             |
| E11.69   | Type 2 diabetes mellitus with other specified complication                                              |
| E11.8    | Type 2 diabetes mellitus with unspecified complications                                                 |
| E11.9    | Type 2 diabetes mellitus without complications                                                          |

## Diabetes (overall) codes [ICD-10 Code]

Excludes gestational diabetes and codes that do not specify pre-existing diabetes in the context of pregnancy.

| Code     | Description                                                                                                                              |
|----------|------------------------------------------------------------------------------------------------------------------------------------------|
| E08.00   | Diabetes mellitus due to underlying condition with hyperosmolarity without nonketotic hyperglycemic-hyperosmolar coma (NKHHC)            |
| E08.01   | Diabetes mellitus due to underlying condition with hyperosmolarity with coma                                                             |
| E08.10   | Diabetes mellitus due to underlying condition with ketoacidosis without coma                                                             |
| E08.11   | Diabetes mellitus due to underlying condition with ketoacidosis with coma                                                                |
| E08.21   | Diabetes mellitus due to underlying condition with diabetic nephropathy                                                                  |
| E08.22   | Diabetes mellitus due to underlying condition with diabetic chronic kidney disease                                                       |
| E08.29   | Diabetes mellitus due to underlying condition with other diabetic kidney complication                                                    |
| E08.311  | Diabetes mellitus due to underlying condition with unspecified diabetic retinopathy with macular edema                                   |
| E08.319  | Diabetes mellitus due to underlying condition with unspecified diabetic retinopathy without macular edema                                |
| E08.321  | Diabetes mellitus due to underlying condition with mild nonproliferative diabetic retinopathy with macular edema                         |
| E08.3211 | Diabetes mellitus due to underlying condition with mild nonproliferative diabetic retinopathy with macular edema, right eye              |
| E08.3212 | Diabetes mellitus due to underlying condition with mild nonproliferative diabetic retinopathy with macular edema, left eye               |
| E08.3213 | Diabetes mellitus due to underlying condition with mild nonproliferative diabetic retinopathy with macular edema, bilateral              |
| E08.3219 | Diabetes mellitus due to underlying condition with mild nonproliferative diabetic retinopathy with macular edema, unspecified eye        |
| E08.329  | Diabetes mellitus due to underlying condition with mild nonproliferative diabetic retinopathy without macular edema                      |
| E08.3291 | Diabetes mellitus due to underlying condition with mild nonproliferative diabetic retinopathy without macular edema, right eye           |
| E08.3292 | Diabetes mellitus due to underlying condition with mild nonproliferative diabetic retinopathy without macular edema, left eye            |
| E08.3293 | Diabetes mellitus due to underlying condition with mild nonproliferative diabetic retinopathy without macular edema, bilateral           |
| E08.3299 | Diabetes mellitus due to underlying condition with mild nonproliferative diabetic retinopathy without macular edema, unspecified eye     |
| E08.331  | Diabetes mellitus due to underlying condition with moderate nonproliferative diabetic retinopathy with macular edema                     |
| E08.3311 | Diabetes mellitus due to underlying condition with moderate nonproliferative diabetic retinopathy with macular edema, right eye          |
| E08.3312 | Diabetes mellitus due to underlying condition with moderate nonproliferative diabetic retinopathy with macular edema, left eye           |
| E08.3313 | Diabetes mellitus due to underlying condition with moderate nonproliferative diabetic retinopathy with macular edema, bilateral          |
| E08.3319 | Diabetes mellitus due to underlying condition with moderate nonproliferative diabetic retinopathy with macular edema, unspecified eye    |
| E08.339  | Diabetes mellitus due to underlying condition with moderate nonproliferative diabetic retinopathy without macular edema                  |
| E08.3391 | Diabetes mellitus due to underlying condition with moderate nonproliferative diabetic retinopathy without macular edema, right eye       |
| E08.3392 | Diabetes mellitus due to underlying condition with moderate nonproliferative diabetic retinopathy without macular edema, left eye        |
| E08.3393 | Diabetes mellitus due to underlying condition with moderate nonproliferative diabetic retinopathy without macular edema, bilateral       |
| E08.3399 | Diabetes mellitus due to underlying condition with moderate nonproliferative diabetic retinopathy without macular edema, unspecified eye |
| E08.341  | Diabetes mellitus due to underlying condition with severe nonproliferative diabetic retinopathy with macular edema                       |
| E08.3411 | Diabetes mellitus due to underlying condition with severe nonproliferative diabetic retinopathy with macular edema, right eye            |
| E08.3412 | Diabetes mellitus due to underlying condition with severe nonproliferative diabetic retinopathy with macular edema, left eye             |
| E08.3413 | Diabetes mellitus due to underlying condition with severe nonproliferative diabetic retinopathy with macular edema, bilateral            |
| E08.3419 | Diabetes mellitus due to underlying condition with severe nonproliferative diabetic retinopathy with macular edema, unspecified eye      |
| E08.349  | Diabetes mellitus due to underlying condition with severe nonproliferative diabetic retinopathy without macular edema                    |



|          |                                                                                                                                                                                        |
|----------|----------------------------------------------------------------------------------------------------------------------------------------------------------------------------------------|
| E08.3491 | Diabetes mellitus due to underlying condition with severe nonproliferative diabetic retinopathy without macular edema, right eye                                                       |
| E08.3492 | Diabetes mellitus due to underlying condition with severe nonproliferative diabetic retinopathy without macular edema, left eye                                                        |
| E08.3493 | Diabetes mellitus due to underlying condition with severe nonproliferative diabetic retinopathy without macular edema, bilateral                                                       |
| E08.3499 | Diabetes mellitus due to underlying condition with severe nonproliferative diabetic retinopathy without macular edema, unspecified eye                                                 |
| E08.351  | Diabetes mellitus due to underlying condition with proliferative diabetic retinopathy with macular edema                                                                               |
| E08.3511 | Diabetes mellitus due to underlying condition with proliferative diabetic retinopathy with macular edema, right eye                                                                    |
| E08.3512 | Diabetes mellitus due to underlying condition with proliferative diabetic retinopathy with macular edema, left eye                                                                     |
| E08.3513 | Diabetes mellitus due to underlying condition with proliferative diabetic retinopathy with macular edema, bilateral                                                                    |
| E08.3519 | Diabetes mellitus due to underlying condition with proliferative diabetic retinopathy with macular edema, unspecified eye                                                              |
| E08.3521 | Diabetes mellitus due to underlying condition with proliferative diabetic retinopathy with traction retinal detachment involving the macula, right eye                                 |
| E08.3522 | Diabetes mellitus due to underlying condition with proliferative diabetic retinopathy with traction retinal detachment involving the macula, left eye                                  |
| E08.3523 | Diabetes mellitus due to underlying condition with proliferative diabetic retinopathy with traction retinal detachment involving the macula, bilateral                                 |
| E08.3529 | Diabetes mellitus due to underlying condition with proliferative diabetic retinopathy with traction retinal detachment involving the macula, unspecified eye                           |
| E08.3531 | Diabetes mellitus due to underlying condition with proliferative diabetic retinopathy with traction retinal detachment not involving the macula, right eye                             |
| E08.3532 | Diabetes mellitus due to underlying condition with proliferative diabetic retinopathy with traction retinal detachment not involving the macula, left eye                              |
| E08.3533 | Diabetes mellitus due to underlying condition with proliferative diabetic retinopathy with traction retinal detachment not involving the macula, bilateral                             |
| E08.3539 | Diabetes mellitus due to underlying condition with proliferative diabetic retinopathy with traction retinal detachment not involving the macula, unspecified eye                       |
| E08.3541 | Diabetes mellitus due to underlying condition with proliferative diabetic retinopathy with combined traction retinal detachment and rhegmatogenous retinal detachment, right eye       |
| E08.3542 | Diabetes mellitus due to underlying condition with proliferative diabetic retinopathy with combined traction retinal detachment and rhegmatogenous retinal detachment, left eye        |
| E08.3543 | Diabetes mellitus due to underlying condition with proliferative diabetic retinopathy with combined traction retinal detachment and rhegmatogenous retinal detachment, bilateral       |
| E08.3549 | Diabetes mellitus due to underlying condition with proliferative diabetic retinopathy with combined traction retinal detachment and rhegmatogenous retinal detachment, unspecified eye |
| E08.3551 | Diabetes mellitus due to underlying condition with stable proliferative diabetic retinopathy, right eye                                                                                |
| E08.3552 | Diabetes mellitus due to underlying condition with stable proliferative diabetic retinopathy, left eye                                                                                 |
| E08.3553 | Diabetes mellitus due to underlying condition with stable proliferative diabetic retinopathy, bilateral                                                                                |
| E08.3559 | Diabetes mellitus due to underlying condition with stable proliferative diabetic retinopathy, unspecified eye                                                                          |
| E08.359  | Diabetes mellitus due to underlying condition with proliferative diabetic retinopathy without macular edema                                                                            |
| E08.3591 | Diabetes mellitus due to underlying condition with proliferative diabetic retinopathy without macular edema, right eye                                                                 |
| E08.3592 | Diabetes mellitus due to underlying condition with proliferative diabetic retinopathy without macular edema, left eye                                                                  |
| E08.3593 | Diabetes mellitus due to underlying condition with proliferative diabetic retinopathy without macular edema, bilateral                                                                 |
| E08.3599 | Diabetes mellitus due to underlying condition with proliferative diabetic retinopathy without macular edema, unspecified eye                                                           |
| E08.36   | Diabetes mellitus due to underlying condition with diabetic cataract                                                                                                                   |
| E08.37X1 | Diabetes mellitus due to underlying condition with diabetic macular edema, resolved following treatment, right eye                                                                     |
| E08.37X2 | Diabetes mellitus due to underlying condition with diabetic macular edema, resolved following treatment, left eye                                                                      |
| E08.37X3 | Diabetes mellitus due to underlying condition with diabetic macular edema, resolved following treatment, bilateral                                                                     |
| E08.37X9 | Diabetes mellitus due to underlying condition with diabetic macular edema, resolved following treatment, unspecified eye                                                               |
| E08.39   | Diabetes mellitus due to underlying condition with other diabetic ophthalmic complication                                                                                              |
| E08.40   | Diabetes mellitus due to underlying condition with diabetic neuropathy, unspecified                                                                                                    |
| E08.41   | Diabetes mellitus due to underlying condition with diabetic mononeuropathy                                                                                                             |
| E08.42   | Diabetes mellitus due to underlying condition with diabetic polyneuropathy                                                                                                             |

|          |                                                                                                                                   |
|----------|-----------------------------------------------------------------------------------------------------------------------------------|
| E08.43   | Diabetes mellitus due to underlying condition with diabetic autonomic (poly)neuropathy                                            |
| E08.44   | Diabetes mellitus due to underlying condition with diabetic amyotrophy                                                            |
| E08.49   | Diabetes mellitus due to underlying condition with other diabetic neurological complication                                       |
| E08.51   | Diabetes mellitus due to underlying condition with diabetic peripheral angiopathy without gangrene                                |
| E08.52   | Diabetes mellitus due to underlying condition with diabetic peripheral angiopathy with gangrene                                   |
| E08.59   | Diabetes mellitus due to underlying condition with other circulatory complications                                                |
| E08.610  | Diabetes mellitus due to underlying condition with diabetic neuropathic arthropathy                                               |
| E08.618  | Diabetes mellitus due to underlying condition with other diabetic arthropathy                                                     |
| E08.620  | Diabetes mellitus due to underlying condition with diabetic dermatitis                                                            |
| E08.621  | Diabetes mellitus due to underlying condition with foot ulcer                                                                     |
| E08.622  | Diabetes mellitus due to underlying condition with other skin ulcer                                                               |
| E08.628  | Diabetes mellitus due to underlying condition with other skin complications                                                       |
| E08.630  | Diabetes mellitus due to underlying condition with periodontal disease                                                            |
| E08.638  | Diabetes mellitus due to underlying condition with other oral complications                                                       |
| E08.641  | Diabetes mellitus due to underlying condition with hypoglycemia with coma                                                         |
| E08.649  | Diabetes mellitus due to underlying condition with hypoglycemia without coma                                                      |
| E08.65   | Diabetes mellitus due to underlying condition with hyperglycemia                                                                  |
| E08.69   | Diabetes mellitus due to underlying condition with other specified complication                                                   |
| E08.8    | Diabetes mellitus due to underlying condition with unspecified complications                                                      |
| E08.9    | Diabetes mellitus due to underlying condition without complications                                                               |
| E09.00   | Drug or chemical induced diabetes mellitus with hyperosmolarity without nonketotic hyperglycemic-hyperosmolar coma (NKHHC)        |
| E09.01   | Drug or chemical induced diabetes mellitus with hyperosmolarity with coma                                                         |
| E09.10   | Drug or chemical induced diabetes mellitus with ketoacidosis without coma                                                         |
| E09.11   | Drug or chemical induced diabetes mellitus with ketoacidosis with coma                                                            |
| E09.21   | Drug or chemical induced diabetes mellitus with diabetic nephropathy                                                              |
| E09.22   | Drug or chemical induced diabetes mellitus with diabetic chronic kidney disease                                                   |
| E09.29   | Drug or chemical induced diabetes mellitus with other diabetic kidney complication                                                |
| E09.311  | Drug or chemical induced diabetes mellitus with unspecified diabetic retinopathy with macular edema                               |
| E09.319  | Drug or chemical induced diabetes mellitus with unspecified diabetic retinopathy without macular edema                            |
| E09.321  | Drug or chemical induced diabetes mellitus with mild nonproliferative diabetic retinopathy with macular edema                     |
| E09.3211 | Drug or chemical induced diabetes mellitus with mild nonproliferative diabetic retinopathy with macular edema, right eye          |
| E09.3212 | Drug or chemical induced diabetes mellitus with mild nonproliferative diabetic retinopathy with macular edema, left eye           |
| E09.3213 | Drug or chemical induced diabetes mellitus with mild nonproliferative diabetic retinopathy with macular edema, bilateral          |
| E09.3219 | Drug or chemical induced diabetes mellitus with mild nonproliferative diabetic retinopathy with macular edema, unspecified eye    |
| E09.329  | Drug or chemical induced diabetes mellitus with mild nonproliferative diabetic retinopathy without macular edema                  |
| E09.3291 | Drug or chemical induced diabetes mellitus with mild nonproliferative diabetic retinopathy without macular edema, right eye       |
| E09.3292 | Drug or chemical induced diabetes mellitus with mild nonproliferative diabetic retinopathy without macular edema, left eye        |
| E09.3293 | Drug or chemical induced diabetes mellitus with mild nonproliferative diabetic retinopathy without macular edema, bilateral       |
| E09.3299 | Drug or chemical induced diabetes mellitus with mild nonproliferative diabetic retinopathy without macular edema, unspecified eye |

- E09.331 Drug or chemical induced diabetes mellitus with moderate nonproliferative diabetic retinopathy with macular edema
- E09.3311 Drug or chemical induced diabetes mellitus with moderate nonproliferative diabetic retinopathy with macular edema, right eye
- E09.3312 Drug or chemical induced diabetes mellitus with moderate nonproliferative diabetic retinopathy with macular edema, left eye
- E09.3313 Drug or chemical induced diabetes mellitus with moderate nonproliferative diabetic retinopathy with macular edema, bilateral
- E09.3319 Drug or chemical induced diabetes mellitus with moderate nonproliferative diabetic retinopathy with macular edema, unspecified eye
- E09.339 Drug or chemical induced diabetes mellitus with moderate nonproliferative diabetic retinopathy without macular edema
- E09.3391 Drug or chemical induced diabetes mellitus with moderate nonproliferative diabetic retinopathy without macular edema, right eye
- E09.3392 Drug or chemical induced diabetes mellitus with moderate nonproliferative diabetic retinopathy without macular edema, left eye
- E09.3393 Drug or chemical induced diabetes mellitus with moderate nonproliferative diabetic retinopathy without macular edema, bilateral
- E09.3399 Drug or chemical induced diabetes mellitus with moderate nonproliferative diabetic retinopathy without macular edema, unspecified eye
- E09.341 Drug or chemical induced diabetes mellitus with severe nonproliferative diabetic retinopathy with macular edema
- E09.3411 Drug or chemical induced diabetes mellitus with severe nonproliferative diabetic retinopathy with macular edema, right eye
- E09.3412 Drug or chemical induced diabetes mellitus with severe nonproliferative diabetic retinopathy with macular edema, left eye
- E09.3413 Drug or chemical induced diabetes mellitus with severe nonproliferative diabetic retinopathy with macular edema, bilateral
- E09.3419 Drug or chemical induced diabetes mellitus with severe nonproliferative diabetic retinopathy with macular edema, unspecified eye
- E09.349 Drug or chemical induced diabetes mellitus with severe nonproliferative diabetic retinopathy without macular edema
- E09.3491 Drug or chemical induced diabetes mellitus with severe nonproliferative diabetic retinopathy without macular edema, right eye
- E09.3492 Drug or chemical induced diabetes mellitus with severe nonproliferative diabetic retinopathy without macular edema, left eye
- E09.3493 Drug or chemical induced diabetes mellitus with severe nonproliferative diabetic retinopathy without macular edema, bilateral
- E09.3499 Drug or chemical induced diabetes mellitus with severe nonproliferative diabetic retinopathy without macular edema, unspecified eye
- E09.351 Drug or chemical induced diabetes mellitus with proliferative diabetic retinopathy with macular edema
- E09.3511 Drug or chemical induced diabetes mellitus with proliferative diabetic retinopathy with macular edema, right eye
- E09.3512 Drug or chemical induced diabetes mellitus with proliferative diabetic retinopathy with macular edema, left eye
- E09.3513 Drug or chemical induced diabetes mellitus with proliferative diabetic retinopathy with macular edema, bilateral
- E09.3519 Drug or chemical induced diabetes mellitus with proliferative diabetic retinopathy with macular edema, unspecified eye
- E09.3521 Drug or chemical induced diabetes mellitus with proliferative diabetic retinopathy with traction retinal detachment involving the macula, right eye
- E09.3522 Drug or chemical induced diabetes mellitus with proliferative diabetic retinopathy with traction retinal detachment involving the macula, left eye
- E09.3523 Drug or chemical induced diabetes mellitus with proliferative diabetic retinopathy with traction retinal detachment involving the macula, bilateral
- E09.3529 Drug or chemical induced diabetes mellitus with proliferative diabetic retinopathy with traction retinal detachment involving the macula, unspecified eye
- E09.3531 Drug or chemical induced diabetes mellitus with proliferative diabetic retinopathy with traction retinal detachment not involving the macula, right eye
- E09.3532 Drug or chemical induced diabetes mellitus with proliferative diabetic retinopathy with traction retinal detachment not involving the macula, left eye
- E09.3533 Drug or chemical induced diabetes mellitus with proliferative diabetic retinopathy with traction retinal detachment not involving the macula, bilateral
- E09.3539 Drug or chemical induced diabetes mellitus with proliferative diabetic retinopathy with traction retinal detachment not involving the macula, unspecified eye
- E09.3541 Drug or chemical induced diabetes mellitus with proliferative diabetic retinopathy with combined traction retinal detachment and rhegmatogenous retinal detachment, right eye
- E09.3542 Drug or chemical induced diabetes mellitus with proliferative diabetic retinopathy with combined traction retinal detachment and rhegmatogenous retinal detachment, left eye
- E09.3543 Drug or chemical induced diabetes mellitus with proliferative diabetic retinopathy with combined traction retinal detachment and rhegmatogenous retinal detachment, bilateral
- E09.3549 Drug or chemical induced diabetes mellitus with proliferative diabetic retinopathy with combined traction retinal detachment and rhegmatogenous retinal detachment, unspecified eye
- E09.3551 Drug or chemical induced diabetes mellitus with stable proliferative diabetic retinopathy, right eye
- E09.3552 Drug or chemical induced diabetes mellitus with stable proliferative diabetic retinopathy, left eye

|          |                                                                                                                           |
|----------|---------------------------------------------------------------------------------------------------------------------------|
| E09.3553 | Drug or chemical induced diabetes mellitus with stable proliferative diabetic retinopathy, bilateral                      |
| E09.3559 | Drug or chemical induced diabetes mellitus with stable proliferative diabetic retinopathy, unspecified eye                |
| E09.359  | Drug or chemical induced diabetes mellitus with proliferative diabetic retinopathy without macular edema                  |
| E09.3591 | Drug or chemical induced diabetes mellitus with proliferative diabetic retinopathy without macular edema, right eye       |
| E09.3592 | Drug or chemical induced diabetes mellitus with proliferative diabetic retinopathy without macular edema, left eye        |
| E09.3593 | Drug or chemical induced diabetes mellitus with proliferative diabetic retinopathy without macular edema, bilateral       |
| E09.3599 | Drug or chemical induced diabetes mellitus with proliferative diabetic retinopathy without macular edema, unspecified eye |
| E09.36   | Drug or chemical induced diabetes mellitus with diabetic cataract                                                         |
| E09.37X1 | Drug or chemical induced diabetes mellitus with diabetic macular edema, resolved following treatment, right eye           |
| E09.37X2 | Drug or chemical induced diabetes mellitus with diabetic macular edema, resolved following treatment, left eye            |
| E09.37X9 | Drug or chemical induced diabetes mellitus with diabetic macular edema, resolved following treatment, unspecified eye     |
| E09.39   | Drug or chemical induced diabetes mellitus with other diabetic ophthalmic complication                                    |
| E09.40   | Drug or chemical induced diabetes mellitus with neurological complications with diabetic neuropathy, unspecified          |
| E09.41   | Drug or chemical induced diabetes mellitus with neurological complications with diabetic mononeuropathy                   |
| E09.42   | Drug or chemical induced diabetes mellitus with neurological complications with diabetic polyneuropathy                   |
| E09.43   | Drug or chemical induced diabetes mellitus with neurological complications with diabetic autonomic (poly)neuropathy       |
| E09.44   | Drug or chemical induced diabetes mellitus with neurological complications with diabetic amyotrophy                       |
| E09.49   | Drug or chemical induced diabetes mellitus with neurological complications with other diabetic neurological complication  |
| E09.51   | Drug or chemical induced diabetes mellitus with diabetic peripheral angiopathy without gangrene                           |
| E09.52   | Drug or chemical induced diabetes mellitus with diabetic peripheral angiopathy with gangrene                              |
| E09.59   | Drug or chemical induced diabetes mellitus with other circulatory complications                                           |
| E09.610  | Drug or chemical induced diabetes mellitus with diabetic neuropathic arthropathy                                          |
| E09.618  | Drug or chemical induced diabetes mellitus with other diabetic arthropathy                                                |
| E09.620  | Drug or chemical induced diabetes mellitus with diabetic dermatitis                                                       |
| E09.621  | Drug or chemical induced diabetes mellitus with foot ulcer                                                                |
| E09.622  | Drug or chemical induced diabetes mellitus with other skin ulcer                                                          |
| E09.628  | Drug or chemical induced diabetes mellitus with other skin complications                                                  |
| E09.630  | Drug or chemical induced diabetes mellitus with periodontal disease                                                       |
| E09.638  | Drug or chemical induced diabetes mellitus with other oral complications                                                  |
| E09.641  | Drug or chemical induced diabetes mellitus with hypoglycemia with coma                                                    |
| E09.649  | Drug or chemical induced diabetes mellitus with hypoglycemia without coma                                                 |
| E09.65   | Drug or chemical induced diabetes mellitus with hyperglycemia                                                             |
| E09.69   | Drug or chemical induced diabetes mellitus with other specified complication                                              |
| E09.8    | Drug or chemical induced diabetes mellitus with unspecified complications                                                 |
| E09.9    | Drug or chemical induced diabetes mellitus without complications                                                          |
| E10.10   | Type 1 diabetes mellitus with ketoacidosis without coma                                                                   |
| E10.11   | Type 1 diabetes mellitus with ketoacidosis with coma                                                                      |
| E10.21   | Type 1 diabetes mellitus with diabetic nephropathy                                                                        |
| E10.22   | Type 1 diabetes mellitus with diabetic chronic kidney disease                                                             |

|          |                                                                                                                                   |
|----------|-----------------------------------------------------------------------------------------------------------------------------------|
| E10.29   | Type 1 diabetes mellitus with other diabetic kidney complication                                                                  |
| E10.311  | Type 1 diabetes mellitus with unspecified diabetic retinopathy with macular edema                                                 |
| E10.319  | Type 1 diabetes mellitus with unspecified diabetic retinopathy without macular edema                                              |
| E10.321  | Type 1 diabetes mellitus with mild nonproliferative diabetic retinopathy with macular edema                                       |
| E10.3211 | Type 1 diabetes mellitus with mild nonproliferative diabetic retinopathy with macular edema, right eye                            |
| E10.3212 | Type 1 diabetes mellitus with mild nonproliferative diabetic retinopathy with macular edema, left eye                             |
| E10.3213 | Type 1 diabetes mellitus with mild nonproliferative diabetic retinopathy with macular edema, bilateral                            |
| E10.3219 | Type 1 diabetes mellitus with mild nonproliferative diabetic retinopathy with macular edema, unspecified eye                      |
| E10.329  | Type 1 diabetes mellitus with mild nonproliferative diabetic retinopathy without macular edema                                    |
| E10.3291 | Type 1 diabetes mellitus with mild nonproliferative diabetic retinopathy without macular edema, right eye                         |
| E10.3292 | Type 1 diabetes mellitus with mild nonproliferative diabetic retinopathy without macular edema, left eye                          |
| E10.3293 | Type 1 diabetes mellitus with mild nonproliferative diabetic retinopathy without macular edema, bilateral                         |
| E10.3299 | Type 1 diabetes mellitus with mild nonproliferative diabetic retinopathy without macular edema, unspecified eye                   |
| E10.331  | Type 1 diabetes mellitus with moderate nonproliferative diabetic retinopathy with macular edema                                   |
| E10.3311 | Type 1 diabetes mellitus with moderate nonproliferative diabetic retinopathy with macular edema, right eye                        |
| E10.3312 | Type 1 diabetes mellitus with moderate nonproliferative diabetic retinopathy with macular edema, left eye                         |
| E10.3313 | Type 1 diabetes mellitus with moderate nonproliferative diabetic retinopathy with macular edema, bilateral                        |
| E10.3319 | Type 1 diabetes mellitus with moderate nonproliferative diabetic retinopathy with macular edema, unspecified eye                  |
| E10.339  | Type 1 diabetes mellitus with moderate nonproliferative diabetic retinopathy without macular edema                                |
| E10.3391 | Type 1 diabetes mellitus with moderate nonproliferative diabetic retinopathy without macular edema, right eye                     |
| E10.3392 | Type 1 diabetes mellitus with moderate nonproliferative diabetic retinopathy without macular edema, left eye                      |
| E10.3393 | Type 1 diabetes mellitus with moderate nonproliferative diabetic retinopathy without macular edema, bilateral                     |
| E10.3399 | Type 1 diabetes mellitus with moderate nonproliferative diabetic retinopathy without macular edema, unspecified eye               |
| E10.341  | Type 1 diabetes mellitus with severe nonproliferative diabetic retinopathy with macular edema                                     |
| E10.3411 | Type 1 diabetes mellitus with severe nonproliferative diabetic retinopathy with macular edema, right eye                          |
| E10.3412 | Type 1 diabetes mellitus with severe nonproliferative diabetic retinopathy with macular edema, left eye                           |
| E10.3413 | Type 1 diabetes mellitus with severe nonproliferative diabetic retinopathy with macular edema, bilateral                          |
| E10.3419 | Type 1 diabetes mellitus with severe nonproliferative diabetic retinopathy with macular edema, unspecified eye                    |
| E10.349  | Type 1 diabetes mellitus with severe nonproliferative diabetic retinopathy without macular edema                                  |
| E10.3491 | Type 1 diabetes mellitus with severe nonproliferative diabetic retinopathy without macular edema, right eye                       |
| E10.3492 | Type 1 diabetes mellitus with severe nonproliferative diabetic retinopathy without macular edema, left eye                        |
| E10.3493 | Type 1 diabetes mellitus with severe nonproliferative diabetic retinopathy without macular edema, bilateral                       |
| E10.3499 | Type 1 diabetes mellitus with severe nonproliferative diabetic retinopathy without macular edema, unspecified eye                 |
| E10.351  | Type 1 diabetes mellitus with proliferative diabetic retinopathy with macular edema                                               |
| E10.3511 | Type 1 diabetes mellitus with proliferative diabetic retinopathy with macular edema, right eye                                    |
| E10.3512 | Type 1 diabetes mellitus with proliferative diabetic retinopathy with macular edema, left eye                                     |
| E10.3513 | Type 1 diabetes mellitus with proliferative diabetic retinopathy with macular edema, bilateral                                    |
| E10.3519 | Type 1 diabetes mellitus with proliferative diabetic retinopathy with macular edema, unspecified eye                              |
| E10.3521 | Type 1 diabetes mellitus with proliferative diabetic retinopathy with traction retinal detachment involving the macula, right eye |

- E10.3522 Type 1 diabetes mellitus with proliferative diabetic retinopathy with traction retinal detachment involving the macula, left eye
- E10.3523 Type 1 diabetes mellitus with proliferative diabetic retinopathy with traction retinal detachment involving the macula, bilateral
- E10.3529 Type 1 diabetes mellitus with proliferative diabetic retinopathy with traction retinal detachment involving the macula, unspecified eye
- E10.3531 Type 1 diabetes mellitus with proliferative diabetic retinopathy with traction retinal detachment not involving the macula, right eye
- E10.3532 Type 1 diabetes mellitus with proliferative diabetic retinopathy with traction retinal detachment not involving the macula, left eye
- E10.3533 Type 1 diabetes mellitus with proliferative diabetic retinopathy with traction retinal detachment not involving the macula, bilateral
- E10.3539 Type 1 diabetes mellitus with proliferative diabetic retinopathy with traction retinal detachment not involving the macula, unspecified eye
- E10.3541 Type 1 diabetes mellitus with proliferative diabetic retinopathy with combined traction retinal detachment and rhegmatogenous retinal detachment, right eye
- E10.3542 Type 1 diabetes mellitus with proliferative diabetic retinopathy with combined traction retinal detachment and rhegmatogenous retinal detachment, left eye
- E10.3543 Type 1 diabetes mellitus with proliferative diabetic retinopathy with combined traction retinal detachment and rhegmatogenous retinal detachment, bilateral
- E10.3549 Type 1 diabetes mellitus with proliferative diabetic retinopathy with combined traction retinal detachment and rhegmatogenous retinal detachment, unspecified eye
- E10.3551 Type 1 diabetes mellitus with stable proliferative diabetic retinopathy, right eye
- E10.3552 Type 1 diabetes mellitus with stable proliferative diabetic retinopathy, left eye
- E10.3553 Type 1 diabetes mellitus with stable proliferative diabetic retinopathy, bilateral
- E10.3559 Type 1 diabetes mellitus with stable proliferative diabetic retinopathy, unspecified eye
- E10.359 Type 1 diabetes mellitus with proliferative diabetic retinopathy without macular edema
- E10.3591 Type 1 diabetes mellitus with proliferative diabetic retinopathy without macular edema, right eye
- E10.3592 Type 1 diabetes mellitus with proliferative diabetic retinopathy without macular edema, left eye
- E10.3593 Type 1 diabetes mellitus with proliferative diabetic retinopathy without macular edema, bilateral
- E10.3599 Type 1 diabetes mellitus with proliferative diabetic retinopathy without macular edema, unspecified eye
- E10.36 Type 1 diabetes mellitus with diabetic cataract
- E10.37X1 Type 1 diabetes mellitus with diabetic macular edema, resolved following treatment, right eye
- E10.37X2 Type 1 diabetes mellitus with diabetic macular edema, resolved following treatment, left eye
- E10.37X3 Type 1 diabetes mellitus with diabetic macular edema, resolved following treatment, bilateral
- E10.37X9 Type 1 diabetes mellitus with diabetic macular edema, resolved following treatment, unspecified eye
- E10.39 Type 1 diabetes mellitus with other diabetic ophthalmic complication
- E10.40 Type 1 diabetes mellitus with diabetic neuropathy, unspecified
- E10.41 Type 1 diabetes mellitus with diabetic mononeuropathy
- E10.42 Type 1 diabetes mellitus with diabetic polyneuropathy
- E10.43 Type 1 diabetes mellitus with diabetic autonomic (poly)neuropathy
- E10.44 Type 1 diabetes mellitus with diabetic amyotrophy
- E10.49 Type 1 diabetes mellitus with other diabetic neurological complication
- E10.51 Type 1 diabetes mellitus with diabetic peripheral angiopathy without gangrene
- E10.52 Type 1 diabetes mellitus with diabetic peripheral angiopathy with gangrene
- E10.59 Type 1 diabetes mellitus with other circulatory complications
- E10.610 Type 1 diabetes mellitus with diabetic neuropathic arthropathy
- E10.618 Type 1 diabetes mellitus with other diabetic arthropathy
- E10.620 Type 1 diabetes mellitus with diabetic dermatitis
- E10.621 Type 1 diabetes mellitus with foot ulcer

|          |                                                                                                                     |
|----------|---------------------------------------------------------------------------------------------------------------------|
| E10.622  | Type 1 diabetes mellitus with other skin ulcer                                                                      |
| E10.628  | Type 1 diabetes mellitus with other skin complications                                                              |
| E10.630  | Type 1 diabetes mellitus with periodontal disease                                                                   |
| E10.638  | Type 1 diabetes mellitus with other oral complications                                                              |
| E10.641  | Type 1 diabetes mellitus with hypoglycemia with coma                                                                |
| E10.649  | Type 1 diabetes mellitus with hypoglycemia without coma                                                             |
| E10.65   | Type 1 diabetes mellitus with hyperglycemia                                                                         |
| E10.69   | Type 1 diabetes mellitus with other specified complication                                                          |
| E10.8    | Type 1 diabetes mellitus with unspecified complications                                                             |
| E10.9    | Type 1 diabetes mellitus without complications                                                                      |
| E11.00   | Type 2 diabetes mellitus with hyperosmolarity without nonketotic hyperglycemic-hyperosmolar coma (NKHHC)            |
| E11.01   | Type 2 diabetes mellitus with hyperosmolarity with coma                                                             |
| E11.10   | Type 2 diabetes mellitus with ketoacidosis without coma                                                             |
| E11.11   | Type 2 diabetes mellitus with ketoacidosis with coma                                                                |
| E11.21   | Type 2 diabetes mellitus with diabetic nephropathy                                                                  |
| E11.22   | Type 2 diabetes mellitus with diabetic chronic kidney disease                                                       |
| E11.29   | Type 2 diabetes mellitus with other diabetic kidney complication                                                    |
| E11.311  | Type 2 diabetes mellitus with unspecified diabetic retinopathy with macular edema                                   |
| E11.319  | Type 2 diabetes mellitus with unspecified diabetic retinopathy without macular edema                                |
| E11.321  | Type 2 diabetes mellitus with mild nonproliferative diabetic retinopathy with macular edema                         |
| E11.3211 | Type 2 diabetes mellitus with mild nonproliferative diabetic retinopathy with macular edema, right eye              |
| E11.3212 | Type 2 diabetes mellitus with mild nonproliferative diabetic retinopathy with macular edema, left eye               |
| E11.3213 | Type 2 diabetes mellitus with mild nonproliferative diabetic retinopathy with macular edema, bilateral              |
| E11.3219 | Type 2 diabetes mellitus with mild nonproliferative diabetic retinopathy with macular edema, unspecified eye        |
| E11.329  | Type 2 diabetes mellitus with mild nonproliferative diabetic retinopathy without macular edema                      |
| E11.3291 | Type 2 diabetes mellitus with mild nonproliferative diabetic retinopathy without macular edema, right eye           |
| E11.3292 | Type 2 diabetes mellitus with mild nonproliferative diabetic retinopathy without macular edema, left eye            |
| E11.3293 | Type 2 diabetes mellitus with mild nonproliferative diabetic retinopathy without macular edema, bilateral           |
| E11.3299 | Type 2 diabetes mellitus with mild nonproliferative diabetic retinopathy without macular edema, unspecified eye     |
| E11.331  | Type 2 diabetes mellitus with moderate nonproliferative diabetic retinopathy with macular edema                     |
| E11.3311 | Type 2 diabetes mellitus with moderate nonproliferative diabetic retinopathy with macular edema, right eye          |
| E11.3312 | Type 2 diabetes mellitus with moderate nonproliferative diabetic retinopathy with macular edema, left eye           |
| E11.3313 | Type 2 diabetes mellitus with moderate nonproliferative diabetic retinopathy with macular edema, bilateral          |
| E11.3319 | Type 2 diabetes mellitus with moderate nonproliferative diabetic retinopathy with macular edema, unspecified eye    |
| E11.339  | Type 2 diabetes mellitus with moderate nonproliferative diabetic retinopathy without macular edema                  |
| E11.3391 | Type 2 diabetes mellitus with moderate nonproliferative diabetic retinopathy without macular edema, right eye       |
| E11.3392 | Type 2 diabetes mellitus with moderate nonproliferative diabetic retinopathy without macular edema, left eye        |
| E11.3393 | Type 2 diabetes mellitus with moderate nonproliferative diabetic retinopathy without macular edema, bilateral       |
| E11.3399 | Type 2 diabetes mellitus with moderate nonproliferative diabetic retinopathy without macular edema, unspecified eye |

- E11.341 Type 2 diabetes mellitus with severe nonproliferative diabetic retinopathy with macular edema
- E11.3411 Type 2 diabetes mellitus with severe nonproliferative diabetic retinopathy with macular edema, right eye
- E11.3412 Type 2 diabetes mellitus with severe nonproliferative diabetic retinopathy with macular edema, left eye
- E11.3413 Type 2 diabetes mellitus with severe nonproliferative diabetic retinopathy with macular edema, bilateral
- E11.3419 Type 2 diabetes mellitus with severe nonproliferative diabetic retinopathy with macular edema, unspecified eye
- E11.349 Type 2 diabetes mellitus with severe nonproliferative diabetic retinopathy without macular edema
- E11.3491 Type 2 diabetes mellitus with severe nonproliferative diabetic retinopathy without macular edema, right eye
- E11.3492 Type 2 diabetes mellitus with severe nonproliferative diabetic retinopathy without macular edema, left eye
- E11.3493 Type 2 diabetes mellitus with severe nonproliferative diabetic retinopathy without macular edema, bilateral
- E11.3499 Type 2 diabetes mellitus with severe nonproliferative diabetic retinopathy without macular edema, unspecified eye
- E11.351 Type 2 diabetes mellitus with proliferative diabetic retinopathy with macular edema
- E11.3511 Type 2 diabetes mellitus with proliferative diabetic retinopathy with macular edema, right eye
- E11.3512 Type 2 diabetes mellitus with proliferative diabetic retinopathy with macular edema, left eye
- E11.3513 Type 2 diabetes mellitus with proliferative diabetic retinopathy with macular edema, bilateral
- E11.3519 Type 2 diabetes mellitus with proliferative diabetic retinopathy with macular edema, unspecified eye
- E11.3521 Type 2 diabetes mellitus with proliferative diabetic retinopathy with traction retinal detachment involving the macula, right eye
- E11.3522 Type 2 diabetes mellitus with proliferative diabetic retinopathy with traction retinal detachment involving the macula, left eye
- E11.3523 Type 2 diabetes mellitus with proliferative diabetic retinopathy with traction retinal detachment involving the macula, bilateral
- E11.3529 Type 2 diabetes mellitus with proliferative diabetic retinopathy with traction retinal detachment involving the macula, unspecified eye
- E11.3531 Type 2 diabetes mellitus with proliferative diabetic retinopathy with traction retinal detachment not involving the macula, right eye
- E11.3532 Type 2 diabetes mellitus with proliferative diabetic retinopathy with traction retinal detachment not involving the macula, left eye
- E11.3533 Type 2 diabetes mellitus with proliferative diabetic retinopathy with traction retinal detachment not involving the macula, bilateral
- E11.3539 Type 2 diabetes mellitus with proliferative diabetic retinopathy with traction retinal detachment not involving the macula, unspecified eye
- E11.3541 Type 2 diabetes mellitus with proliferative diabetic retinopathy with combined traction retinal detachment and rhegmatogenous retinal detachment, right eye
- E11.3542 Type 2 diabetes mellitus with proliferative diabetic retinopathy with combined traction retinal detachment and rhegmatogenous retinal detachment, left eye
- E11.3543 Type 2 diabetes mellitus with proliferative diabetic retinopathy with combined traction retinal detachment and rhegmatogenous retinal detachment, bilateral
- E11.3549 Type 2 diabetes mellitus with proliferative diabetic retinopathy with combined traction retinal detachment and rhegmatogenous retinal detachment, unspecified eye
- E11.3551 Type 2 diabetes mellitus with stable proliferative diabetic retinopathy, right eye
- E11.3552 Type 2 diabetes mellitus with stable proliferative diabetic retinopathy, left eye
- E11.3553 Type 2 diabetes mellitus with stable proliferative diabetic retinopathy, bilateral
- E11.3559 Type 2 diabetes mellitus with stable proliferative diabetic retinopathy, unspecified eye
- E11.359 Type 2 diabetes mellitus with proliferative diabetic retinopathy without macular edema
- E11.3591 Type 2 diabetes mellitus with proliferative diabetic retinopathy without macular edema, right eye
- E11.3592 Type 2 diabetes mellitus with proliferative diabetic retinopathy without macular edema, left eye
- E11.3593 Type 2 diabetes mellitus with proliferative diabetic retinopathy without macular edema, bilateral
- E11.3599 Type 2 diabetes mellitus with proliferative diabetic retinopathy without macular edema, unspecified eye
- E11.36 Type 2 diabetes mellitus with diabetic cataract
- E11.37X1 Type 2 diabetes mellitus with diabetic macular edema, resolved following treatment, right eye
- E11.37X2 Type 2 diabetes mellitus with diabetic macular edema, resolved following treatment, left eye



|          |                                                                                                                   |
|----------|-------------------------------------------------------------------------------------------------------------------|
| E11.37X3 | Type 2 diabetes mellitus with diabetic macular edema, resolved following treatment, bilateral                     |
| E11.37X9 | Type 2 diabetes mellitus with diabetic macular edema, resolved following treatment, unspecified eye               |
| E11.39   | Type 2 diabetes mellitus with other diabetic ophthalmic complication                                              |
| E11.40   | Type 2 diabetes mellitus with diabetic neuropathy, unspecified                                                    |
| E11.41   | Type 2 diabetes mellitus with diabetic mononeuropathy                                                             |
| E11.42   | Type 2 diabetes mellitus with diabetic polyneuropathy                                                             |
| E11.43   | Type 2 diabetes mellitus with diabetic autonomic (poly)neuropathy                                                 |
| E11.44   | Type 2 diabetes mellitus with diabetic amyotrophy                                                                 |
| E11.49   | Type 2 diabetes mellitus with other diabetic neurological complication                                            |
| E11.51   | Type 2 diabetes mellitus with diabetic peripheral angiopathy without gangrene                                     |
| E11.52   | Type 2 diabetes mellitus with diabetic peripheral angiopathy with gangrene                                        |
| E11.59   | Type 2 diabetes mellitus with other circulatory complications                                                     |
| E11.610  | Type 2 diabetes mellitus with diabetic neuropathic arthropathy                                                    |
| E11.618  | Type 2 diabetes mellitus with other diabetic arthropathy                                                          |
| E11.620  | Type 2 diabetes mellitus with diabetic dermatitis                                                                 |
| E11.621  | Type 2 diabetes mellitus with foot ulcer                                                                          |
| E11.622  | Type 2 diabetes mellitus with other skin ulcer                                                                    |
| E11.628  | Type 2 diabetes mellitus with other skin complications                                                            |
| E11.630  | Type 2 diabetes mellitus with periodontal disease                                                                 |
| E11.638  | Type 2 diabetes mellitus with other oral complications                                                            |
| E11.641  | Type 2 diabetes mellitus with hypoglycemia with coma                                                              |
| E11.649  | Type 2 diabetes mellitus with hypoglycemia without coma                                                           |
| E11.65   | Type 2 diabetes mellitus with hyperglycemia                                                                       |
| E11.69   | Type 2 diabetes mellitus with other specified complication                                                        |
| E11.8    | Type 2 diabetes mellitus with unspecified complications                                                           |
| E11.9    | Type 2 diabetes mellitus without complications                                                                    |
| E13.00   | Other specified diabetes mellitus with hyperosmolarity without nonketotic hyperglycemic-hyperosmolar coma (NKHHC) |
| E13.01   | Other specified diabetes mellitus with hyperosmolarity with coma                                                  |
| E13.10   | Other specified diabetes mellitus with ketoacidosis without coma                                                  |
| E13.11   | Other specified diabetes mellitus with ketoacidosis with coma                                                     |
| E13.21   | Other specified diabetes mellitus with diabetic nephropathy                                                       |
| E13.22   | Other specified diabetes mellitus with diabetic chronic kidney disease                                            |
| E13.29   | Other specified diabetes mellitus with other diabetic kidney complication                                         |
| E13.311  | Other specified diabetes mellitus with unspecified diabetic retinopathy with macular edema                        |
| E13.319  | Other specified diabetes mellitus with unspecified diabetic retinopathy without macular edema                     |
| E13.321  | Other specified diabetes mellitus with mild nonproliferative diabetic retinopathy with macular edema              |
| E13.3211 | Other specified diabetes mellitus with mild nonproliferative diabetic retinopathy with macular edema, right eye   |
| E13.3212 | Other specified diabetes mellitus with mild nonproliferative diabetic retinopathy with macular edema, left eye    |
| E13.3213 | Other specified diabetes mellitus with mild nonproliferative diabetic retinopathy with macular edema, bilateral   |

- E13.3219 Other specified diabetes mellitus with mild nonproliferative diabetic retinopathy with macular edema, unspecified eye
- E13.329 Other specified diabetes mellitus with mild nonproliferative diabetic retinopathy without macular edema
- E13.3291 Other specified diabetes mellitus with mild nonproliferative diabetic retinopathy without macular edema, right eye
- E13.3292 Other specified diabetes mellitus with mild nonproliferative diabetic retinopathy without macular edema, left eye
- E13.3293 Other specified diabetes mellitus with mild nonproliferative diabetic retinopathy without macular edema, bilateral
- E13.3299 Other specified diabetes mellitus with mild nonproliferative diabetic retinopathy without macular edema, unspecified eye
- E13.331 Other specified diabetes mellitus with moderate nonproliferative diabetic retinopathy with macular edema
- E13.3311 Other specified diabetes mellitus with moderate nonproliferative diabetic retinopathy with macular edema, right eye
- E13.3312 Other specified diabetes mellitus with moderate nonproliferative diabetic retinopathy with macular edema, left eye
- E13.3313 Other specified diabetes mellitus with moderate nonproliferative diabetic retinopathy with macular edema, bilateral
- E13.3319 Other specified diabetes mellitus with moderate nonproliferative diabetic retinopathy with macular edema, unspecified eye
- E13.339 Other specified diabetes mellitus with moderate nonproliferative diabetic retinopathy without macular edema
- E13.3391 Other specified diabetes mellitus with moderate nonproliferative diabetic retinopathy without macular edema, right eye
- E13.3392 Other specified diabetes mellitus with moderate nonproliferative diabetic retinopathy without macular edema, left eye
- E13.3393 Other specified diabetes mellitus with moderate nonproliferative diabetic retinopathy without macular edema, bilateral
- E13.3399 Other specified diabetes mellitus with moderate nonproliferative diabetic retinopathy without macular edema, unspecified eye
- E13.341 Other specified diabetes mellitus with severe nonproliferative diabetic retinopathy with macular edema
- E13.3411 Other specified diabetes mellitus with severe nonproliferative diabetic retinopathy with macular edema, right eye
- E13.3412 Other specified diabetes mellitus with severe nonproliferative diabetic retinopathy with macular edema, left eye
- E13.3413 Other specified diabetes mellitus with severe nonproliferative diabetic retinopathy with macular edema, bilateral
- E13.3419 Other specified diabetes mellitus with severe nonproliferative diabetic retinopathy with macular edema, unspecified eye
- E13.349 Other specified diabetes mellitus with severe nonproliferative diabetic retinopathy without macular edema
- E13.3491 Other specified diabetes mellitus with severe nonproliferative diabetic retinopathy without macular edema, right eye
- E13.3492 Other specified diabetes mellitus with severe nonproliferative diabetic retinopathy without macular edema, left eye
- E13.3493 Other specified diabetes mellitus with severe nonproliferative diabetic retinopathy without macular edema, bilateral
- E13.3499 Other specified diabetes mellitus with severe nonproliferative diabetic retinopathy without macular edema, unspecified eye
- E13.351 Other specified diabetes mellitus with proliferative diabetic retinopathy with macular edema
- E13.3511 Other specified diabetes mellitus with proliferative diabetic retinopathy with macular edema, right eye
- E13.3512 Other specified diabetes mellitus with proliferative diabetic retinopathy with macular edema, left eye
- E13.3513 Other specified diabetes mellitus with proliferative diabetic retinopathy with macular edema, bilateral
- E13.3519 Other specified diabetes mellitus with proliferative diabetic retinopathy with macular edema, unspecified eye
- E13.3521 Other specified diabetes mellitus with proliferative diabetic retinopathy with traction retinal detachment involving the macula, right eye
- E13.3522 Other specified diabetes mellitus with proliferative diabetic retinopathy with traction retinal detachment involving the macula, left eye
- E13.3523 Other specified diabetes mellitus with proliferative diabetic retinopathy with traction retinal detachment involving the macula, bilateral
- E13.3529 Other specified diabetes mellitus with proliferative diabetic retinopathy with traction retinal detachment involving the macula, unspecified eye
- E13.3531 Other specified diabetes mellitus with proliferative diabetic retinopathy with traction retinal detachment not involving the macula, right eye
- E13.3532 Other specified diabetes mellitus with proliferative diabetic retinopathy with traction retinal detachment not involving the macula, left eye
- E13.3533 Other specified diabetes mellitus with proliferative diabetic retinopathy with traction retinal detachment not involving the macula, bilateral
- E13.3539 Other specified diabetes mellitus with proliferative diabetic retinopathy with traction retinal detachment not involving the macula, unspecified eye

- E13.3541 Other specified diabetes mellitus with proliferative diabetic retinopathy with combined traction retinal detachment and rhegmatogenous retinal detachment, right eye
- E13.3542 Other specified diabetes mellitus with proliferative diabetic retinopathy with combined traction retinal detachment and rhegmatogenous retinal detachment, left eye
- E13.3543 Other specified diabetes mellitus with proliferative diabetic retinopathy with combined traction retinal detachment and rhegmatogenous retinal detachment, bilateral
- E13.3549 Other specified diabetes mellitus with proliferative diabetic retinopathy with combined traction retinal detachment and rhegmatogenous retinal detachment, unspecified eye
- E13.3551 Other specified diabetes mellitus with stable proliferative diabetic retinopathy, right eye
- E13.3552 Other specified diabetes mellitus with stable proliferative diabetic retinopathy, left eye
- E13.3553 Other specified diabetes mellitus with stable proliferative diabetic retinopathy, bilateral
- E13.3559 Other specified diabetes mellitus with stable proliferative diabetic retinopathy, unspecified eye
- E13.359 Other specified diabetes mellitus with proliferative diabetic retinopathy without macular edema
- E13.3591 Other specified diabetes mellitus with proliferative diabetic retinopathy without macular edema, right eye
- E13.3592 Other specified diabetes mellitus with proliferative diabetic retinopathy without macular edema, left eye
- E13.3593 Other specified diabetes mellitus with proliferative diabetic retinopathy without macular edema, bilateral
- E13.3599 Other specified diabetes mellitus with proliferative diabetic retinopathy without macular edema, unspecified eye
- E13.36 Other specified diabetes mellitus with diabetic cataract
- E13.37X1 Other specified diabetes mellitus with diabetic macular edema, resolved following treatment, right eye
- E13.37X2 Other specified diabetes mellitus with diabetic macular edema, resolved following treatment, left eye
- E13.37X3 Other specified diabetes mellitus with diabetic macular edema, resolved following treatment, bilateral
- E13.37X9 Other specified diabetes mellitus with diabetic macular edema, resolved following treatment, unspecified eye
- E13.39 Other specified diabetes mellitus with other diabetic ophthalmic complication
- E13.40 Other specified diabetes mellitus with diabetic neuropathy, unspecified
- E13.41 Other specified diabetes mellitus with diabetic mononeuropathy
- E13.42 Other specified diabetes mellitus with diabetic polyneuropathy
- E13.43 Other specified diabetes mellitus with diabetic autonomic (poly)neuropathy
- E13.44 Other specified diabetes mellitus with diabetic amyotrophy
- E13.49 Other specified diabetes mellitus with other diabetic neurological complication
- E13.51 Other specified diabetes mellitus with diabetic peripheral angiopathy without gangrene
- E13.52 Other specified diabetes mellitus with diabetic peripheral angiopathy with gangrene
- E13.59 Other specified diabetes mellitus with other circulatory complications
- E13.610 Other specified diabetes mellitus with diabetic neuropathic arthropathy
- E13.618 Other specified diabetes mellitus with other diabetic arthropathy
- E13.620 Other specified diabetes mellitus with diabetic dermatitis
- E13.621 Other specified diabetes mellitus with foot ulcer
- E13.622 Other specified diabetes mellitus with other skin ulcer
- E13.628 Other specified diabetes mellitus with other skin complications
- E13.630 Other specified diabetes mellitus with periodontal disease
- E13.638 Other specified diabetes mellitus with other oral complications
- E13.641 Other specified diabetes mellitus with hypoglycemia with coma
- E13.649 Other specified diabetes mellitus with hypoglycemia without coma
- E13.65 Other specified diabetes mellitus with hyperglycemia

|         |                                                                                |
|---------|--------------------------------------------------------------------------------|
| E13.69  | Other specified diabetes mellitus with other specified complication            |
| E13.8   | Other specified diabetes mellitus with unspecified complications               |
| E13.9   | Other specified diabetes mellitus without complications                        |
| O24.011 | Pre-existing type 1 diabetes mellitus, in pregnancy, first trimester           |
| O24.012 | Pre-existing type 1 diabetes mellitus, in pregnancy, second trimester          |
| O24.013 | Pre-existing type 1 diabetes mellitus, in pregnancy, third trimester           |
| O24.019 | Pre-existing type 1 diabetes mellitus, in pregnancy, unspecified trimester     |
| O24.02  | Pre-existing type 1 diabetes mellitus, in childbirth                           |
| O24.03  | Pre-existing type 1 diabetes mellitus, in the puerperium                       |
| O24.111 | Pre-existing type 2 diabetes mellitus, in pregnancy, first trimester           |
| O24.112 | Pre-existing type 2 diabetes mellitus, in pregnancy, second trimester          |
| O24.113 | Pre-existing type 2 diabetes mellitus, in pregnancy, third trimester           |
| O24.119 | Pre-existing type 2 diabetes mellitus, in pregnancy, unspecified trimester     |
| O24.12  | Pre-existing type 2 diabetes mellitus, in childbirth                           |
| O24.13  | Pre-existing type 2 diabetes mellitus, in the puerperium                       |
| O24.311 | Unspecified pre-existing diabetes mellitus in pregnancy, first trimester       |
| O24.312 | Unspecified pre-existing diabetes mellitus in pregnancy, second trimester      |
| O24.313 | Unspecified pre-existing diabetes mellitus in pregnancy, third trimester       |
| O24.319 | Unspecified pre-existing diabetes mellitus in pregnancy, unspecified trimester |
| O24.32  | Unspecified pre-existing diabetes mellitus in childbirth                       |
| O24.33  | Unspecified pre-existing diabetes mellitus in the puerperium                   |
| O24.811 | Other pre-existing diabetes mellitus in pregnancy, first trimester             |
| O24.812 | Other pre-existing diabetes mellitus in pregnancy, second trimester            |
| O24.813 | Other pre-existing diabetes mellitus in pregnancy, third trimester             |
| O24.819 | Other pre-existing diabetes mellitus in pregnancy, unspecified trimester       |
| O24.82  | Other pre-existing diabetes mellitus in childbirth                             |
| O24.83  | Other pre-existing diabetes mellitus in the puerperium                         |

**Anxiety codes [ICD-10 Code]**

| <b>Code</b> | <b>Description</b>                                                                                               |
|-------------|------------------------------------------------------------------------------------------------------------------|
| F06.4       | Anxiety disorder due to known physiological condition                                                            |
| F10.180     | Alcohol abuse with alcohol-induced anxiety disorder                                                              |
| F10.280     | Alcohol dependence with alcohol-induced anxiety disorder                                                         |
| F10.980     | Alcohol use, unspecified with alcohol-induced anxiety disorder                                                   |
| F12.180     | Cannabis abuse with cannabis-induced anxiety disorder                                                            |
| F12.280     | Cannabis dependence with cannabis-induced anxiety disorder                                                       |
| F12.980     | Cannabis use, unspecified with anxiety disorder                                                                  |
| F13.180     | Sedative, hypnotic or anxiolytic abuse with sedative, hypnotic or anxiolytic-induced anxiety disorder            |
| F13.280     | Sedative, hypnotic or anxiolytic dependence with sedative, hypnotic or anxiolytic-induced anxiety disorder       |
| F13.980     | Sedative, hypnotic or anxiolytic use, unspecified with sedative, hypnotic or anxiolytic-induced anxiety disorder |
| F14.180     | Cocaine abuse with cocaine-induced anxiety disorder                                                              |
| F14.280     | Cocaine dependence with cocaine-induced anxiety disorder                                                         |
| F14.980     | Cocaine use, unspecified with cocaine-induced anxiety disorder                                                   |
| F15.180     | Other stimulant abuse with stimulant-induced anxiety disorder                                                    |
| F15.280     | Other stimulant dependence with stimulant-induced anxiety disorder                                               |
| F15.980     | Other stimulant use, unspecified with stimulant-induced anxiety disorder                                         |
| F16.180     | Hallucinogen abuse with hallucinogen-induced anxiety disorder                                                    |
| F16.280     | Hallucinogen dependence with hallucinogen-induced anxiety disorder                                               |
| F16.980     | Hallucinogen use, unspecified with hallucinogen-induced anxiety disorder                                         |
| F18.180     | Inhalant abuse with inhalant-induced anxiety disorder                                                            |
| F18.280     | Inhalant dependence with inhalant-induced anxiety disorder                                                       |
| F18.980     | Inhalant use, unspecified with inhalant-induced anxiety disorder                                                 |
| F19.180     | Other psychoactive substance abuse with psychoactive substance-induced anxiety disorder                          |
| F19.280     | Other psychoactive substance dependence with psychoactive substance-induced anxiety disorder                     |
| F19.980     | Other psychoactive substance use, unspecified with psychoactive substance-induced anxiety disorder               |
| F40.00      | Agoraphobia, unspecified                                                                                         |
| F40.01      | Agoraphobia with panic disorder                                                                                  |
| F40.02      | Agoraphobia without panic disorder                                                                               |
| F40.10      | Social phobia, unspecified                                                                                       |

|         |                                              |
|---------|----------------------------------------------|
| F40.11  | Social phobia, generalized                   |
| F40.210 | Arachnophobia                                |
| F40.218 | Other animal type phobia                     |
| F40.220 | Fear of thunderstorms                        |
| F40.228 | Other natural environment type phobia        |
| F40.230 | Fear of blood                                |
| F40.231 | Fear of injections and transfusions          |
| F40.232 | Fear of other medical care                   |
| F40.233 | Fear of injury                               |
| F40.240 | Claustrophobia                               |
| F40.241 | Acrophobia                                   |
| F40.242 | Fear of bridges                              |
| F40.243 | Fear of flying                               |
| F40.248 | Other situational type phobia                |
| F40.290 | Androphobia                                  |
| F40.291 | Gynephobia                                   |
| F40.298 | Other specified phobia                       |
| F40.8   | Other phobic anxiety disorders               |
| F40.9   | Phobic anxiety disorder, unspecified         |
| F41.0   | Panic disorder [episodic paroxysmal anxiety] |
| F41.1   | Generalized anxiety disorder                 |
| F41.3   | Other mixed anxiety disorders                |
| F41.8   | Other specified anxiety disorders            |
| F41.9   | Anxiety disorder, unspecified                |

**Depression codes [ICD-10 Code]**

| <b>Code</b> | <b>Description</b>                                                                    |
|-------------|---------------------------------------------------------------------------------------|
| F06.31      | Mood disorder due to known physiological condition with depressive features           |
| F06.32      | Mood disorder due to known physiological condition with major depressive-like episode |
| F32.0       | Major depressive disorder, single episode, mild                                       |
| F32.1       | Major depressive disorder, single episode, moderate                                   |
| F32.2       | Major depressive disorder, single episode, severe without psychotic features          |
| F32.3       | Major depressive disorder, single episode, severe with psychotic features             |
| F32.4       | Major depressive disorder, single episode, in partial remission                       |
| F32.5       | Major depressive disorder, single episode, in full remission                          |
| F32.8       | Other depressive episodes                                                             |
| F32.89      | Other specified depressive episodes                                                   |
| F32.9       | Major depressive disorder, single episode, unspecified                                |
| F33.0       | Major depressive disorder, recurrent, mild                                            |
| F33.1       | Major depressive disorder, recurrent, moderate                                        |
| F33.2       | Major depressive disorder, recurrent severe without psychotic features                |
| F33.3       | Major depressive disorder, recurrent, severe with psychotic symptoms                  |
| F33.40      | Major depressive disorder, recurrent, in remission, unspecified                       |
| F33.41      | Major depressive disorder, recurrent, in partial remission                            |
| F33.42      | Major depressive disorder, recurrent, in full remission                               |
| F33.8       | Other recurrent depressive disorders                                                  |
| F33.9       | Major depressive disorder, recurrent, unspecified                                     |
| F34.1       | Dysthymic disorder                                                                    |

**Rheumatoid arthritis codes [ICD-10 Code]**

| <b>Code</b> | <b>Description</b>                                                        |
|-------------|---------------------------------------------------------------------------|
| M05.00      | Felty's syndrome, unspecified site                                        |
| M05.011     | Felty's syndrome, right shoulder                                          |
| M05.012     | Felty's syndrome, left shoulder                                           |
| M05.019     | Felty's syndrome, unspecified shoulder                                    |
| M05.021     | Felty's syndrome, right elbow                                             |
| M05.022     | Felty's syndrome, left elbow                                              |
| M05.029     | Felty's syndrome, unspecified elbow                                       |
| M05.031     | Felty's syndrome, right wrist                                             |
| M05.032     | Felty's syndrome, left wrist                                              |
| M05.039     | Felty's syndrome, unspecified wrist                                       |
| M05.041     | Felty's syndrome, right hand                                              |
| M05.042     | Felty's syndrome, left hand                                               |
| M05.049     | Felty's syndrome, unspecified hand                                        |
| M05.051     | Felty's syndrome, right hip                                               |
| M05.052     | Felty's syndrome, left hip                                                |
| M05.059     | Felty's syndrome, unspecified hip                                         |
| M05.061     | Felty's syndrome, right knee                                              |
| M05.062     | Felty's syndrome, left knee                                               |
| M05.069     | Felty's syndrome, unspecified knee                                        |
| M05.071     | Felty's syndrome, right ankle and foot                                    |
| M05.072     | Felty's syndrome, left ankle and foot                                     |
| M05.079     | Felty's syndrome, unspecified ankle and foot                              |
| M05.09      | Felty's syndrome, multiple sites                                          |
| M05.10      | Rheumatoid lung disease with rheumatoid arthritis of unspecified site     |
| M05.111     | Rheumatoid lung disease with rheumatoid arthritis of right shoulder       |
| M05.112     | Rheumatoid lung disease with rheumatoid arthritis of left shoulder        |
| M05.119     | Rheumatoid lung disease with rheumatoid arthritis of unspecified shoulder |
| M05.121     | Rheumatoid lung disease with rheumatoid arthritis of right elbow          |
| M05.122     | Rheumatoid lung disease with rheumatoid arthritis of left elbow           |



|         |                                                                                 |
|---------|---------------------------------------------------------------------------------|
| M05.129 | Rheumatoid lung disease with rheumatoid arthritis of unspecified elbow          |
| M05.131 | Rheumatoid lung disease with rheumatoid arthritis of right wrist                |
| M05.132 | Rheumatoid lung disease with rheumatoid arthritis of left wrist                 |
| M05.139 | Rheumatoid lung disease with rheumatoid arthritis of unspecified wrist          |
| M05.141 | Rheumatoid lung disease with rheumatoid arthritis of right hand                 |
| M05.142 | Rheumatoid lung disease with rheumatoid arthritis of left hand                  |
| M05.149 | Rheumatoid lung disease with rheumatoid arthritis of unspecified hand           |
| M05.151 | Rheumatoid lung disease with rheumatoid arthritis of right hip                  |
| M05.152 | Rheumatoid lung disease with rheumatoid arthritis of left hip                   |
| M05.159 | Rheumatoid lung disease with rheumatoid arthritis of unspecified hip            |
| M05.161 | Rheumatoid lung disease with rheumatoid arthritis of right knee                 |
| M05.162 | Rheumatoid lung disease with rheumatoid arthritis of left knee                  |
| M05.169 | Rheumatoid lung disease with rheumatoid arthritis of unspecified knee           |
| M05.171 | Rheumatoid lung disease with rheumatoid arthritis of right ankle and foot       |
| M05.172 | Rheumatoid lung disease with rheumatoid arthritis of left ankle and foot        |
| M05.179 | Rheumatoid lung disease with rheumatoid arthritis of unspecified ankle and foot |
| M05.19  | Rheumatoid lung disease with rheumatoid arthritis of multiple sites             |
| M05.20  | Rheumatoid vasculitis with rheumatoid arthritis of unspecified site             |
| M05.211 | Rheumatoid vasculitis with rheumatoid arthritis of right shoulder               |
| M05.212 | Rheumatoid vasculitis with rheumatoid arthritis of left shoulder                |
| M05.219 | Rheumatoid vasculitis with rheumatoid arthritis of unspecified shoulder         |
| M05.221 | Rheumatoid vasculitis with rheumatoid arthritis of right elbow                  |
| M05.222 | Rheumatoid vasculitis with rheumatoid arthritis of left elbow                   |
| M05.229 | Rheumatoid vasculitis with rheumatoid arthritis of unspecified elbow            |
| M05.231 | Rheumatoid vasculitis with rheumatoid arthritis of right wrist                  |
| M05.232 | Rheumatoid vasculitis with rheumatoid arthritis of left wrist                   |
| M05.239 | Rheumatoid vasculitis with rheumatoid arthritis of unspecified wrist            |
| M05.241 | Rheumatoid vasculitis with rheumatoid arthritis of right hand                   |
| M05.242 | Rheumatoid vasculitis with rheumatoid arthritis of left hand                    |
| M05.249 | Rheumatoid vasculitis with rheumatoid arthritis of unspecified hand             |
| M05.251 | Rheumatoid vasculitis with rheumatoid arthritis of right hip                    |

|         |                                                                                  |
|---------|----------------------------------------------------------------------------------|
| M05.252 | Rheumatoid vasculitis with rheumatoid arthritis of left hip                      |
| M05.259 | Rheumatoid vasculitis with rheumatoid arthritis of unspecified hip               |
| M05.261 | Rheumatoid vasculitis with rheumatoid arthritis of right knee                    |
| M05.262 | Rheumatoid vasculitis with rheumatoid arthritis of left knee                     |
| M05.269 | Rheumatoid vasculitis with rheumatoid arthritis of unspecified knee              |
| M05.271 | Rheumatoid vasculitis with rheumatoid arthritis of right ankle and foot          |
| M05.272 | Rheumatoid vasculitis with rheumatoid arthritis of left ankle and foot           |
| M05.279 | Rheumatoid vasculitis with rheumatoid arthritis of unspecified ankle and foot    |
| M05.29  | Rheumatoid vasculitis with rheumatoid arthritis of multiple sites                |
| M05.30  | Rheumatoid heart disease with rheumatoid arthritis of unspecified site           |
| M05.311 | Rheumatoid heart disease with rheumatoid arthritis of right shoulder             |
| M05.312 | Rheumatoid heart disease with rheumatoid arthritis of left shoulder              |
| M05.319 | Rheumatoid heart disease with rheumatoid arthritis of unspecified shoulder       |
| M05.321 | Rheumatoid heart disease with rheumatoid arthritis of right elbow                |
| M05.322 | Rheumatoid heart disease with rheumatoid arthritis of left elbow                 |
| M05.329 | Rheumatoid heart disease with rheumatoid arthritis of unspecified elbow          |
| M05.331 | Rheumatoid heart disease with rheumatoid arthritis of right wrist                |
| M05.332 | Rheumatoid heart disease with rheumatoid arthritis of left wrist                 |
| M05.339 | Rheumatoid heart disease with rheumatoid arthritis of unspecified wrist          |
| M05.341 | Rheumatoid heart disease with rheumatoid arthritis of right hand                 |
| M05.342 | Rheumatoid heart disease with rheumatoid arthritis of left hand                  |
| M05.349 | Rheumatoid heart disease with rheumatoid arthritis of unspecified hand           |
| M05.351 | Rheumatoid heart disease with rheumatoid arthritis of right hip                  |
| M05.352 | Rheumatoid heart disease with rheumatoid arthritis of left hip                   |
| M05.359 | Rheumatoid heart disease with rheumatoid arthritis of unspecified hip            |
| M05.361 | Rheumatoid heart disease with rheumatoid arthritis of right knee                 |
| M05.362 | Rheumatoid heart disease with rheumatoid arthritis of left knee                  |
| M05.369 | Rheumatoid heart disease with rheumatoid arthritis of unspecified knee           |
| M05.371 | Rheumatoid heart disease with rheumatoid arthritis of right ankle and foot       |
| M05.372 | Rheumatoid heart disease with rheumatoid arthritis of left ankle and foot        |
| M05.379 | Rheumatoid heart disease with rheumatoid arthritis of unspecified ankle and foot |

|         |                                                                             |
|---------|-----------------------------------------------------------------------------|
| M05.39  | Rheumatoid heart disease with rheumatoid arthritis of multiple sites        |
| M05.40  | Rheumatoid myopathy with rheumatoid arthritis of unspecified site           |
| M05.411 | Rheumatoid myopathy with rheumatoid arthritis of right shoulder             |
| M05.412 | Rheumatoid myopathy with rheumatoid arthritis of left shoulder              |
| M05.419 | Rheumatoid myopathy with rheumatoid arthritis of unspecified shoulder       |
| M05.421 | Rheumatoid myopathy with rheumatoid arthritis of right elbow                |
| M05.422 | Rheumatoid myopathy with rheumatoid arthritis of left elbow                 |
| M05.429 | Rheumatoid myopathy with rheumatoid arthritis of unspecified elbow          |
| M05.431 | Rheumatoid myopathy with rheumatoid arthritis of right wrist                |
| M05.432 | Rheumatoid myopathy with rheumatoid arthritis of left wrist                 |
| M05.439 | Rheumatoid myopathy with rheumatoid arthritis of unspecified wrist          |
| M05.441 | Rheumatoid myopathy with rheumatoid arthritis of right hand                 |
| M05.442 | Rheumatoid myopathy with rheumatoid arthritis of left hand                  |
| M05.449 | Rheumatoid myopathy with rheumatoid arthritis of unspecified hand           |
| M05.451 | Rheumatoid myopathy with rheumatoid arthritis of right hip                  |
| M05.452 | Rheumatoid myopathy with rheumatoid arthritis of left hip                   |
| M05.459 | Rheumatoid myopathy with rheumatoid arthritis of unspecified hip            |
| M05.461 | Rheumatoid myopathy with rheumatoid arthritis of right knee                 |
| M05.462 | Rheumatoid myopathy with rheumatoid arthritis of left knee                  |
| M05.469 | Rheumatoid myopathy with rheumatoid arthritis of unspecified knee           |
| M05.471 | Rheumatoid myopathy with rheumatoid arthritis of right ankle and foot       |
| M05.472 | Rheumatoid myopathy with rheumatoid arthritis of left ankle and foot        |
| M05.479 | Rheumatoid myopathy with rheumatoid arthritis of unspecified ankle and foot |
| M05.49  | Rheumatoid myopathy with rheumatoid arthritis of multiple sites             |
| M05.50  | Rheumatoid polyneuropathy with rheumatoid arthritis of unspecified site     |
| M05.511 | Rheumatoid polyneuropathy with rheumatoid arthritis of right shoulder       |
| M05.512 | Rheumatoid polyneuropathy with rheumatoid arthritis of left shoulder        |
| M05.519 | Rheumatoid polyneuropathy with rheumatoid arthritis of unspecified shoulder |
| M05.521 | Rheumatoid polyneuropathy with rheumatoid arthritis of right elbow          |
| M05.522 | Rheumatoid polyneuropathy with rheumatoid arthritis of left elbow           |
| M05.529 | Rheumatoid polyneuropathy with rheumatoid arthritis of unspecified elbow    |

- M05.531 Rheumatoid polyneuropathy with rheumatoid arthritis of right wrist
- M05.532 Rheumatoid polyneuropathy with rheumatoid arthritis of left wrist
- M05.539 Rheumatoid polyneuropathy with rheumatoid arthritis of unspecified wrist
- M05.541 Rheumatoid polyneuropathy with rheumatoid arthritis of right hand
- M05.542 Rheumatoid polyneuropathy with rheumatoid arthritis of left hand
- M05.549 Rheumatoid polyneuropathy with rheumatoid arthritis of unspecified hand
- M05.551 Rheumatoid polyneuropathy with rheumatoid arthritis of right hip
- M05.552 Rheumatoid polyneuropathy with rheumatoid arthritis of left hip
- M05.559 Rheumatoid polyneuropathy with rheumatoid arthritis of unspecified hip
- M05.561 Rheumatoid polyneuropathy with rheumatoid arthritis of right knee
- M05.562 Rheumatoid polyneuropathy with rheumatoid arthritis of left knee
- M05.569 Rheumatoid polyneuropathy with rheumatoid arthritis of unspecified knee
- M05.571 Rheumatoid polyneuropathy with rheumatoid arthritis of right ankle and foot
- M05.572 Rheumatoid polyneuropathy with rheumatoid arthritis of left ankle and foot
- M05.579 Rheumatoid polyneuropathy with rheumatoid arthritis of unspecified ankle and foot
- M05.59 Rheumatoid polyneuropathy with rheumatoid arthritis of multiple sites
- M05.60 Rheumatoid arthritis of unspecified site with involvement of other organs and systems
- M05.611 Rheumatoid arthritis of right shoulder with involvement of other organs and systems
- M05.612 Rheumatoid arthritis of left shoulder with involvement of other organs and systems
- M05.619 Rheumatoid arthritis of unspecified shoulder with involvement of other organs and systems
- M05.621 Rheumatoid arthritis of right elbow with involvement of other organs and systems
- M05.622 Rheumatoid arthritis of left elbow with involvement of other organs and systems
- M05.629 Rheumatoid arthritis of unspecified elbow with involvement of other organs and systems
- M05.631 Rheumatoid arthritis of right wrist with involvement of other organs and systems
- M05.632 Rheumatoid arthritis of left wrist with involvement of other organs and systems
- M05.639 Rheumatoid arthritis of unspecified wrist with involvement of other organs and systems
- M05.641 Rheumatoid arthritis of right hand with involvement of other organs and systems
- M05.642 Rheumatoid arthritis of left hand with involvement of other organs and systems
- M05.649 Rheumatoid arthritis of unspecified hand with involvement of other organs and systems
- M05.651 Rheumatoid arthritis of right hip with involvement of other organs and systems
- M05.652 Rheumatoid arthritis of left hip with involvement of other organs and systems

- M05.659 Rheumatoid arthritis of unspecified hip with involvement of other organs and systems
- M05.661 Rheumatoid arthritis of right knee with involvement of other organs and systems
- M05.662 Rheumatoid arthritis of left knee with involvement of other organs and systems
- M05.669 Rheumatoid arthritis of unspecified knee with involvement of other organs and systems
- M05.671 Rheumatoid arthritis of right ankle and foot with involvement of other organs and systems
- M05.672 Rheumatoid arthritis of left ankle and foot with involvement of other organs and systems
- M05.679 Rheumatoid arthritis of unspecified ankle and foot with involvement of other organs and systems
- M05.69 Rheumatoid arthritis of multiple sites with involvement of other organs and systems
- M05.70 Rheumatoid arthritis with rheumatoid factor of unspecified site without organ or systems involvement
- M05.711 Rheumatoid arthritis with rheumatoid factor of right shoulder without organ or systems involvement
- M05.712 Rheumatoid arthritis with rheumatoid factor of left shoulder without organ or systems involvement
- M05.719 Rheumatoid arthritis with rheumatoid factor of unspecified shoulder without organ or systems involvement
- M05.721 Rheumatoid arthritis with rheumatoid factor of right elbow without organ or systems involvement
- M05.722 Rheumatoid arthritis with rheumatoid factor of left elbow without organ or systems involvement
- M05.729 Rheumatoid arthritis with rheumatoid factor of unspecified elbow without organ or systems involvement
- M05.731 Rheumatoid arthritis with rheumatoid factor of right wrist without organ or systems involvement
- M05.732 Rheumatoid arthritis with rheumatoid factor of left wrist without organ or systems involvement
- M05.739 Rheumatoid arthritis with rheumatoid factor of unspecified wrist without organ or systems involvement
- M05.741 Rheumatoid arthritis with rheumatoid factor of right hand without organ or systems involvement
- M05.742 Rheumatoid arthritis with rheumatoid factor of left hand without organ or systems involvement
- M05.749 Rheumatoid arthritis with rheumatoid factor of unspecified hand without organ or systems involvement
- M05.751 Rheumatoid arthritis with rheumatoid factor of right hip without organ or systems involvement
- M05.752 Rheumatoid arthritis with rheumatoid factor of left hip without organ or systems involvement
- M05.759 Rheumatoid arthritis with rheumatoid factor of unspecified hip without organ or systems involvement
- M05.761 Rheumatoid arthritis with rheumatoid factor of right knee without organ or systems involvement
- M05.762 Rheumatoid arthritis with rheumatoid factor of left knee without organ or systems involvement
- M05.769 Rheumatoid arthritis with rheumatoid factor of unspecified knee without organ or systems involvement
- M05.771 Rheumatoid arthritis with rheumatoid factor of right ankle and foot without organ or systems involvement
- M05.772 Rheumatoid arthritis with rheumatoid factor of left ankle and foot without organ or systems involvement
- M05.779 Rheumatoid arthritis with rheumatoid factor of unspecified ankle and foot without organ or systems involvement
- M05.79 Rheumatoid arthritis with rheumatoid factor of multiple sites without organ or systems involvement

|         |                                                                                 |
|---------|---------------------------------------------------------------------------------|
| M05.80  | Other rheumatoid arthritis with rheumatoid factor of unspecified site           |
| M05.811 | Other rheumatoid arthritis with rheumatoid factor of right shoulder             |
| M05.812 | Other rheumatoid arthritis with rheumatoid factor of left shoulder              |
| M05.819 | Other rheumatoid arthritis with rheumatoid factor of unspecified shoulder       |
| M05.821 | Other rheumatoid arthritis with rheumatoid factor of right elbow                |
| M05.822 | Other rheumatoid arthritis with rheumatoid factor of left elbow                 |
| M05.829 | Other rheumatoid arthritis with rheumatoid factor of unspecified elbow          |
| M05.831 | Other rheumatoid arthritis with rheumatoid factor of right wrist                |
| M05.832 | Other rheumatoid arthritis with rheumatoid factor of left wrist                 |
| M05.839 | Other rheumatoid arthritis with rheumatoid factor of unspecified wrist          |
| M05.841 | Other rheumatoid arthritis with rheumatoid factor of right hand                 |
| M05.842 | Other rheumatoid arthritis with rheumatoid factor of left hand                  |
| M05.849 | Other rheumatoid arthritis with rheumatoid factor of unspecified hand           |
| M05.851 | Other rheumatoid arthritis with rheumatoid factor of right hip                  |
| M05.852 | Other rheumatoid arthritis with rheumatoid factor of left hip                   |
| M05.859 | Other rheumatoid arthritis with rheumatoid factor of unspecified hip            |
| M05.861 | Other rheumatoid arthritis with rheumatoid factor of right knee                 |
| M05.862 | Other rheumatoid arthritis with rheumatoid factor of left knee                  |
| M05.869 | Other rheumatoid arthritis with rheumatoid factor of unspecified knee           |
| M05.871 | Other rheumatoid arthritis with rheumatoid factor of right ankle and foot       |
| M05.872 | Other rheumatoid arthritis with rheumatoid factor of left ankle and foot        |
| M05.879 | Other rheumatoid arthritis with rheumatoid factor of unspecified ankle and foot |
| M05.89  | Other rheumatoid arthritis with rheumatoid factor of multiple sites             |
| M05.9   | Rheumatoid arthritis with rheumatoid factor, unspecified                        |
| M06.00  | Rheumatoid arthritis without rheumatoid factor, unspecified site                |
| M06.011 | Rheumatoid arthritis without rheumatoid factor, right shoulder                  |
| M06.012 | Rheumatoid arthritis without rheumatoid factor, left shoulder                   |
| M06.019 | Rheumatoid arthritis without rheumatoid factor, unspecified shoulder            |
| M06.021 | Rheumatoid arthritis without rheumatoid factor, right elbow                     |
| M06.022 | Rheumatoid arthritis without rheumatoid factor, left elbow                      |
| M06.029 | Rheumatoid arthritis without rheumatoid factor, unspecified elbow               |

|         |                                                                            |
|---------|----------------------------------------------------------------------------|
| M06.031 | Rheumatoid arthritis without rheumatoid factor, right wrist                |
| M06.032 | Rheumatoid arthritis without rheumatoid factor, left wrist                 |
| M06.039 | Rheumatoid arthritis without rheumatoid factor, unspecified wrist          |
| M06.041 | Rheumatoid arthritis without rheumatoid factor, right hand                 |
| M06.042 | Rheumatoid arthritis without rheumatoid factor, left hand                  |
| M06.049 | Rheumatoid arthritis without rheumatoid factor, unspecified hand           |
| M06.051 | Rheumatoid arthritis without rheumatoid factor, right hip                  |
| M06.052 | Rheumatoid arthritis without rheumatoid factor, left hip                   |
| M06.059 | Rheumatoid arthritis without rheumatoid factor, unspecified hip            |
| M06.061 | Rheumatoid arthritis without rheumatoid factor, right knee                 |
| M06.062 | Rheumatoid arthritis without rheumatoid factor, left knee                  |
| M06.069 | Rheumatoid arthritis without rheumatoid factor, unspecified knee           |
| M06.071 | Rheumatoid arthritis without rheumatoid factor, right ankle and foot       |
| M06.072 | Rheumatoid arthritis without rheumatoid factor, left ankle and foot        |
| M06.079 | Rheumatoid arthritis without rheumatoid factor, unspecified ankle and foot |
| M06.08  | Rheumatoid arthritis without rheumatoid factor, vertebrae                  |
| M06.09  | Rheumatoid arthritis without rheumatoid factor, multiple sites             |
| M06.1   | Adult-onset Still's disease                                                |
| M06.20  | Rheumatoid bursitis, unspecified site                                      |
| M06.211 | Rheumatoid bursitis, right shoulder                                        |
| M06.212 | Rheumatoid bursitis, left shoulder                                         |
| M06.219 | Rheumatoid bursitis, unspecified shoulder                                  |
| M06.221 | Rheumatoid bursitis, right elbow                                           |
| M06.222 | Rheumatoid bursitis, left elbow                                            |
| M06.229 | Rheumatoid bursitis, unspecified elbow                                     |
| M06.231 | Rheumatoid bursitis, right wrist                                           |
| M06.232 | Rheumatoid bursitis, left wrist                                            |
| M06.239 | Rheumatoid bursitis, unspecified wrist                                     |
| M06.241 | Rheumatoid bursitis, right hand                                            |
| M06.242 | Rheumatoid bursitis, left hand                                             |
| M06.249 | Rheumatoid bursitis, unspecified hand                                      |

M06.251 Rheumatoid bursitis, right hip  
M06.252 Rheumatoid bursitis, left hip  
M06.259 Rheumatoid bursitis, unspecified hip  
M06.261 Rheumatoid bursitis, right knee  
M06.262 Rheumatoid bursitis, left knee  
M06.269 Rheumatoid bursitis, unspecified knee  
M06.271 Rheumatoid bursitis, right ankle and foot  
M06.272 Rheumatoid bursitis, left ankle and foot  
M06.279 Rheumatoid bursitis, unspecified ankle and foot  
M06.28 Rheumatoid bursitis, vertebrae  
M06.29 Rheumatoid bursitis, multiple sites  
M06.30 Rheumatoid nodule, unspecified site  
M06.311 Rheumatoid nodule, right shoulder  
M06.312 Rheumatoid nodule, left shoulder  
M06.319 Rheumatoid nodule, unspecified shoulder  
M06.321 Rheumatoid nodule, right elbow  
M06.322 Rheumatoid nodule, left elbow  
M06.329 Rheumatoid nodule, unspecified elbow  
M06.331 Rheumatoid nodule, right wrist  
M06.332 Rheumatoid nodule, left wrist  
M06.339 Rheumatoid nodule, unspecified wrist  
M06.341 Rheumatoid nodule, right hand  
M06.342 Rheumatoid nodule, left hand  
M06.349 Rheumatoid nodule, unspecified hand  
M06.351 Rheumatoid nodule, right hip  
M06.352 Rheumatoid nodule, left hip  
M06.359 Rheumatoid nodule, unspecified hip  
M06.361 Rheumatoid nodule, right knee  
M06.362 Rheumatoid nodule, left knee  
M06.369 Rheumatoid nodule, unspecified knee  
M06.371 Rheumatoid nodule, right ankle and foot



|         |                                                                  |
|---------|------------------------------------------------------------------|
| M06.372 | Rheumatoid nodule, left ankle and foot                           |
| M06.379 | Rheumatoid nodule, unspecified ankle and foot                    |
| M06.38  | Rheumatoid nodule, vertebrae                                     |
| M06.39  | Rheumatoid nodule, multiple sites                                |
| M06.4   | Inflammatory polyarthropathy                                     |
| M06.80  | Other specified rheumatoid arthritis, unspecified site           |
| M06.811 | Other specified rheumatoid arthritis, right shoulder             |
| M06.812 | Other specified rheumatoid arthritis, left shoulder              |
| M06.819 | Other specified rheumatoid arthritis, unspecified shoulder       |
| M06.821 | Other specified rheumatoid arthritis, right elbow                |
| M06.822 | Other specified rheumatoid arthritis, left elbow                 |
| M06.829 | Other specified rheumatoid arthritis, unspecified elbow          |
| M06.831 | Other specified rheumatoid arthritis, right wrist                |
| M06.832 | Other specified rheumatoid arthritis, left wrist                 |
| M06.839 | Other specified rheumatoid arthritis, unspecified wrist          |
| M06.841 | Other specified rheumatoid arthritis, right hand                 |
| M06.842 | Other specified rheumatoid arthritis, left hand                  |
| M06.849 | Other specified rheumatoid arthritis, unspecified hand           |
| M06.851 | Other specified rheumatoid arthritis, right hip                  |
| M06.852 | Other specified rheumatoid arthritis, left hip                   |
| M06.859 | Other specified rheumatoid arthritis, unspecified hip            |
| M06.861 | Other specified rheumatoid arthritis, right knee                 |
| M06.862 | Other specified rheumatoid arthritis, left knee                  |
| M06.869 | Other specified rheumatoid arthritis, unspecified knee           |
| M06.871 | Other specified rheumatoid arthritis, right ankle and foot       |
| M06.872 | Other specified rheumatoid arthritis, left ankle and foot        |
| M06.879 | Other specified rheumatoid arthritis, unspecified ankle and foot |
| M06.88  | Other specified rheumatoid arthritis, vertebrae                  |
| M06.89  | Other specified rheumatoid arthritis, multiple sites             |
| M06.9   | Rheumatoid arthritis, unspecified                                |
| M08.00  | Unspecified juvenile rheumatoid arthritis of unspecified site    |

|         |                                                                         |
|---------|-------------------------------------------------------------------------|
| M08.011 | Unspecified juvenile rheumatoid arthritis, right shoulder               |
| M08.012 | Unspecified juvenile rheumatoid arthritis, left shoulder                |
| M08.019 | Unspecified juvenile rheumatoid arthritis, unspecified shoulder         |
| M08.021 | Unspecified juvenile rheumatoid arthritis, right elbow                  |
| M08.022 | Unspecified juvenile rheumatoid arthritis, left elbow                   |
| M08.029 | Unspecified juvenile rheumatoid arthritis, unspecified elbow            |
| M08.031 | Unspecified juvenile rheumatoid arthritis, right wrist                  |
| M08.032 | Unspecified juvenile rheumatoid arthritis, left wrist                   |
| M08.039 | Unspecified juvenile rheumatoid arthritis, unspecified wrist            |
| M08.041 | Unspecified juvenile rheumatoid arthritis, right hand                   |
| M08.042 | Unspecified juvenile rheumatoid arthritis, left hand                    |
| M08.049 | Unspecified juvenile rheumatoid arthritis, unspecified hand             |
| M08.051 | Unspecified juvenile rheumatoid arthritis, right hip                    |
| M08.052 | Unspecified juvenile rheumatoid arthritis, left hip                     |
| M08.059 | Unspecified juvenile rheumatoid arthritis, unspecified hip              |
| M08.061 | Unspecified juvenile rheumatoid arthritis, right knee                   |
| M08.062 | Unspecified juvenile rheumatoid arthritis, left knee                    |
| M08.069 | Unspecified juvenile rheumatoid arthritis, unspecified knee             |
| M08.071 | Unspecified juvenile rheumatoid arthritis, right ankle and foot         |
| M08.072 | Unspecified juvenile rheumatoid arthritis, left ankle and foot          |
| M08.079 | Unspecified juvenile rheumatoid arthritis, unspecified ankle and foot   |
| M08.08  | Unspecified juvenile rheumatoid arthritis, vertebrae                    |
| M08.09  | Unspecified juvenile rheumatoid arthritis, multiple sites               |
| M08.20  | Juvenile rheumatoid arthritis with systemic onset, unspecified site     |
| M08.211 | Juvenile rheumatoid arthritis with systemic onset, right shoulder       |
| M08.212 | Juvenile rheumatoid arthritis with systemic onset, left shoulder        |
| M08.219 | Juvenile rheumatoid arthritis with systemic onset, unspecified shoulder |
| M08.221 | Juvenile rheumatoid arthritis with systemic onset, right elbow          |
| M08.222 | Juvenile rheumatoid arthritis with systemic onset, left elbow           |
| M08.229 | Juvenile rheumatoid arthritis with systemic onset, unspecified elbow    |
| M08.231 | Juvenile rheumatoid arthritis with systemic onset, right wrist          |

|         |                                                                               |
|---------|-------------------------------------------------------------------------------|
| M08.232 | Juvenile rheumatoid arthritis with systemic onset, left wrist                 |
| M08.239 | Juvenile rheumatoid arthritis with systemic onset, unspecified wrist          |
| M08.241 | Juvenile rheumatoid arthritis with systemic onset, right hand                 |
| M08.242 | Juvenile rheumatoid arthritis with systemic onset, left hand                  |
| M08.249 | Juvenile rheumatoid arthritis with systemic onset, unspecified hand           |
| M08.251 | Juvenile rheumatoid arthritis with systemic onset, right hip                  |
| M08.252 | Juvenile rheumatoid arthritis with systemic onset, left hip                   |
| M08.259 | Juvenile rheumatoid arthritis with systemic onset, unspecified hip            |
| M08.261 | Juvenile rheumatoid arthritis with systemic onset, right knee                 |
| M08.262 | Juvenile rheumatoid arthritis with systemic onset, left knee                  |
| M08.269 | Juvenile rheumatoid arthritis with systemic onset, unspecified knee           |
| M08.271 | Juvenile rheumatoid arthritis with systemic onset, right ankle and foot       |
| M08.272 | Juvenile rheumatoid arthritis with systemic onset, left ankle and foot        |
| M08.279 | Juvenile rheumatoid arthritis with systemic onset, unspecified ankle and foot |
| M08.28  | Juvenile rheumatoid arthritis with systemic onset, vertebrae                  |
| M08.29  | Juvenile rheumatoid arthritis with systemic onset, multiple sites             |
| M08.3   | Juvenile rheumatoid polyarthritis (seronegative)                              |
| M08.40  | Pauciarticular juvenile rheumatoid arthritis, unspecified site                |
| M08.411 | Pauciarticular juvenile rheumatoid arthritis, right shoulder                  |
| M08.412 | Pauciarticular juvenile rheumatoid arthritis, left shoulder                   |
| M08.419 | Pauciarticular juvenile rheumatoid arthritis, unspecified shoulder            |
| M08.421 | Pauciarticular juvenile rheumatoid arthritis, right elbow                     |
| M08.422 | Pauciarticular juvenile rheumatoid arthritis, left elbow                      |
| M08.429 | Pauciarticular juvenile rheumatoid arthritis, unspecified elbow               |
| M08.431 | Pauciarticular juvenile rheumatoid arthritis, right wrist                     |
| M08.432 | Pauciarticular juvenile rheumatoid arthritis, left wrist                      |
| M08.439 | Pauciarticular juvenile rheumatoid arthritis, unspecified wrist               |
| M08.441 | Pauciarticular juvenile rheumatoid arthritis, right hand                      |
| M08.442 | Pauciarticular juvenile rheumatoid arthritis, left hand                       |
| M08.449 | Pauciarticular juvenile rheumatoid arthritis, unspecified hand                |
| M08.451 | Pauciarticular juvenile rheumatoid arthritis, right hip                       |

- M08.452 Pauciarticular juvenile rheumatoid arthritis, left hip
- M08.459 Pauciarticular juvenile rheumatoid arthritis, unspecified hip
- M08.461 Pauciarticular juvenile rheumatoid arthritis, right knee
- M08.462 Pauciarticular juvenile rheumatoid arthritis, left knee
- M08.469 Pauciarticular juvenile rheumatoid arthritis, unspecified knee
- M08.471 Pauciarticular juvenile rheumatoid arthritis, right ankle and foot
- M08.472 Pauciarticular juvenile rheumatoid arthritis, left ankle and foot
- M08.479 Pauciarticular juvenile rheumatoid arthritis, unspecified ankle and foot
- M08.48 Pauciarticular juvenile rheumatoid arthritis, vertebrae

**UTI codes [ICD-10 Code]**

Excludes UTIs in pregnancy.

| <b>Code</b> | <b>Description</b>                                                                              |
|-------------|-------------------------------------------------------------------------------------------------|
| A02.25      | Salmonella pyelonephritis                                                                       |
| A06.81      | Amebic cystitis                                                                                 |
| A36.85      | Diphtheritic cystitis                                                                           |
| A54.00      | Gonococcal infection of lower genitourinary tract, unspecified                                  |
| A54.01      | Gonococcal cystitis and urethritis, unspecified                                                 |
| A54.09      | Other gonococcal infection of lower genitourinary tract                                         |
| A54.1       | Gonococcal infection of lower genitourinary tract with periurethral and accessory gland abscess |
| A56.00      | Chlamydial infection of lower genitourinary tract, unspecified                                  |
| A56.01      | Chlamydial cystitis and urethritis                                                              |
| A56.09      | Other chlamydial infection of lower genitourinary tract                                         |
| A56.2       | Chlamydial infection of genitourinary tract, unspecified                                        |
| A59.03      | Trichomonal cystitis and urethritis                                                             |
| A59.09      | Other urogenital trichomoniasis                                                                 |
| B37.41      | Candidal cystitis and urethritis                                                                |
| B37.49      | Other urogenital candidiasis                                                                    |
| N10         | Acute pyelonephritis                                                                            |
| N30.00      | Acute cystitis without hematuria                                                                |
| N30.01      | Acute cystitis with hematuria                                                                   |
| N30.90      | Cystitis, unspecified without hematuria                                                         |
| N30.91      | Cystitis, unspecified with hematuria                                                            |
| N34.1       | Nonspecific urethritis                                                                          |
| N34.2       | Other urethritis                                                                                |
| N39.0       | Urinary tract infection, site not specified                                                     |

**Raynauds syndrome codes [ICD-10 Code]**

| <b>Code</b> | <b>Description</b>                  |
|-------------|-------------------------------------|
| I73.00      | Raynaud's syndrome without gangrene |
| I73.01      | Raynaud's syndrome with gangrene    |

**Sjogrens syndrome codes [ICD-10 Code]**

| <b>Code</b> | <b>Description</b>                                    |
|-------------|-------------------------------------------------------|
| M35.00      | Sjögren syndrome, unspecified                         |
| M35.01      | Sjögren syndrome with keratoconjunctivitis            |
| M35.02      | Sjögren syndrome with lung involvement                |
| M35.03      | Sjögren syndrome with myopathy                        |
| M35.04      | Sjögren syndrome with tubulo-interstitial nephropathy |
| M35.09      | Sjögren syndrome with other organ involvement         |

**Autoimmune thyroid disease codes [ICD-10 Code]**

| <b>Code</b> | <b>Description</b>                                                    |
|-------------|-----------------------------------------------------------------------|
| E05.00      | Thyrotoxicosis with diffuse goiter without thyrotoxic crisis or storm |
| E05.01      | Thyrotoxicosis with diffuse goiter with thyrotoxic crisis or storm    |
| E06.3       | Autoimmune thyroiditis                                                |



**Sleep-related issues codes [ICD-10 Code]**

| <b>Code</b> | <b>Description</b>                                                     |
|-------------|------------------------------------------------------------------------|
| F51.01      | Primary insomnia                                                       |
| F51.02      | Adjustment insomnia                                                    |
| F51.09      | Other insomnia not due to a substance or known physiological condition |
| F51.12      | Insufficient sleep syndrome                                            |
| G47.00      | Insomnia, unspecified                                                  |
| G47.01      | Insomnia due to medical condition                                      |
| G47.09      | Other insomnia                                                         |
| G47.27      | Circadian rhythm sleep disorder in conditions classified elsewhere     |
| G47.8       | Other sleep disorders                                                  |
| G47.9       | Sleep disorder, unspecified                                            |
| Z72.820     | Sleep deprivation                                                      |

**Cognitive impairment codes [ICD-10 Code]**

| <b>Code</b> | <b>Description</b>                                                                                          |
|-------------|-------------------------------------------------------------------------------------------------------------|
| F01.50      | Vascular dementia without behavioral disturbance                                                            |
| F01.51      | Vascular dementia with behavioral disturbance                                                               |
| F02.80      | Dementia in other diseases classified elsewhere without behavioral disturbance                              |
| F02.81      | Dementia in other diseases classified elsewhere with behavioral disturbance                                 |
| F03.90      | Unspecified dementia without behavioral disturbance                                                         |
| F03.91      | Unspecified dementia with behavioral disturbance                                                            |
| F04         | Amnesic disorder due to known physiological condition                                                       |
| F05         | Delirium due to known physiological condition                                                               |
| G30.0       | Alzheimer's disease with early onset                                                                        |
| G30.1       | Alzheimer's disease with late onset                                                                         |
| G30.8       | Other Alzheimer's disease                                                                                   |
| G30.9       | Alzheimer's disease, unspecified                                                                            |
| G31.01      | Pick's disease                                                                                              |
| G31.09      | Other frontotemporal dementia                                                                               |
| G31.83      | Dementia with Lewy bodies                                                                                   |
| G31.84      | Mild cognitive impairment, so stated                                                                        |
| I69.01      | Cognitive deficits following nontraumatic subarachnoid hemorrhage                                           |
| I69.010     | Attention and concentration deficit following nontraumatic subarachnoid hemorrhage                          |
| I69.011     | Memory deficit following nontraumatic subarachnoid hemorrhage                                               |
| I69.013     | Psychomotor deficit following nontraumatic subarachnoid hemorrhage                                          |
| I69.014     | Frontal lobe and executive function deficit following nontraumatic subarachnoid hemorrhage                  |
| I69.015     | Cognitive social or emotional deficit following nontraumatic subarachnoid hemorrhage                        |
| I69.018     | Other symptoms and signs involving cognitive functions following nontraumatic subarachnoid hemorrhage       |
| I69.019     | Unspecified symptoms and signs involving cognitive functions following nontraumatic subarachnoid hemorrhage |
| I69.11      | Cognitive deficits following nontraumatic intracerebral hemorrhage                                          |
| I69.110     | Attention and concentration deficit following nontraumatic intracerebral hemorrhage                         |
| I69.111     | Memory deficit following nontraumatic intracerebral hemorrhage                                              |
| I69.113     | Psychomotor deficit following nontraumatic intracerebral hemorrhage                                         |
| I69.114     | Frontal lobe and executive function deficit following nontraumatic intracerebral hemorrhage                 |

|         |                                                                                                                   |
|---------|-------------------------------------------------------------------------------------------------------------------|
| I69.115 | Cognitive social or emotional deficit following nontraumatic intracerebral hemorrhage                             |
| I69.118 | Other symptoms and signs involving cognitive functions following nontraumatic intracerebral hemorrhage            |
| I69.119 | Unspecified symptoms and signs involving cognitive functions following nontraumatic intracerebral hemorrhage      |
| I69.21  | Cognitive deficits following other nontraumatic intracranial hemorrhage                                           |
| I69.210 | Attention and concentration deficit following other nontraumatic intracranial hemorrhage                          |
| I69.211 | Memory deficit following other nontraumatic intracranial hemorrhage                                               |
| I69.213 | Psychomotor deficit following other nontraumatic intracranial hemorrhage                                          |
| I69.214 | Frontal lobe and executive function deficit following other nontraumatic intracranial hemorrhage                  |
| I69.215 | Cognitive social or emotional deficit following other nontraumatic intracranial hemorrhage                        |
| I69.218 | Other symptoms and signs involving cognitive functions following other nontraumatic intracranial hemorrhage       |
| I69.219 | Unspecified symptoms and signs involving cognitive functions following other nontraumatic intracranial hemorrhage |
| I69.31  | Cognitive deficits following cerebral infarction                                                                  |
| I69.310 | Attention and concentration deficit following cerebral infarction                                                 |
| I69.311 | Memory deficit following cerebral infarction                                                                      |
| I69.313 | Psychomotor deficit following cerebral infarction                                                                 |
| I69.314 | Frontal lobe and executive function deficit following cerebral infarction                                         |
| I69.315 | Cognitive social or emotional deficit following cerebral infarction                                               |
| I69.318 | Other symptoms and signs involving cognitive functions following cerebral infarction                              |
| I69.319 | Unspecified symptoms and signs involving cognitive functions following cerebral infarction                        |
| I69.81  | Cognitive deficits following other cerebrovascular disease                                                        |
| I69.810 | Attention and concentration deficit following other cerebrovascular disease                                       |
| I69.811 | Memory deficit following other cerebrovascular disease                                                            |
| I69.813 | Psychomotor deficit following other cerebrovascular disease                                                       |
| I69.814 | Frontal lobe and executive function deficit following other cerebrovascular disease                               |
| I69.815 | Cognitive social or emotional deficit following other cerebrovascular disease                                     |
| I69.818 | Other symptoms and signs involving cognitive functions following other cerebrovascular disease                    |
| I69.819 | Unspecified symptoms and signs involving cognitive functions following other cerebrovascular disease              |
| I69.91  | Cognitive deficits following unspecified cerebrovascular disease                                                  |
| I69.910 | Attention and concentration deficit following unspecified cerebrovascular disease                                 |
| I69.911 | Memory deficit following unspecified cerebrovascular disease                                                      |
| I69.913 | Psychomotor deficit following unspecified cerebrovascular disease                                                 |

- I69.914 Frontal lobe and executive function deficit following unspecified cerebrovascular disease
- I69.915 Cognitive social or emotional deficit following unspecified cerebrovascular disease
- I69.918 Other symptoms and signs involving cognitive functions following unspecified cerebrovascular disease
- I69.919 Unspecified symptoms and signs involving cognitive functions following unspecified cerebrovascular disease
- R41.1 Anterograde amnesia
- R41.2 Retrograde amnesia
- R41.3 Other amnesia
- R41.4 Neurologic neglect syndrome
- R41.81 Age-related cognitive decline
- R41.83 Borderline intellectual functioning
- R41.840 Attention and concentration deficit
- R41.841 Cognitive communication deficit
- R41.843 Psychomotor deficit
- R41.844 Frontal lobe and executive function deficit
- R41.89 Other symptoms and signs involving cognitive functions and awareness
- R41.9 Unspecified symptoms and signs involving cognitive functions and awareness

**Itch or pruritus codes [ICD-10 Code]**

| <b>Code</b> | <b>Description</b>               |
|-------------|----------------------------------|
| L29.0       | Pruritus ani                     |
| L29.1       | Pruritus scroti                  |
| L29.2       | Pruritus vulvae                  |
| L29.3       | Anogenital pruritus, unspecified |
| L29.8       | Other pruritus                   |
| L29.9       | Pruritus, unspecified            |

**Diarrhoea codes [ICD-10 Code]**

| <b>Code</b> | <b>Description</b>                                          |
|-------------|-------------------------------------------------------------|
| K58.0       | Irritable bowel syndrome with diarrhea                      |
| K59.1       | Functional diarrhea                                         |
| R19.7       | Diarrhea, unspecified                                       |
| T47.6X5A    | Adverse effect of antidiarrheal drugs, initial encounter    |
| T47.6X5D    | Adverse effect of antidiarrheal drugs, subsequent encounter |
| T47.6X5S    | Adverse effect of antidiarrheal drugs, sequela              |
| T47.6X6A    | Underdosing of antidiarrheal drugs, initial encounter       |
| T47.6X6D    | Underdosing of antidiarrheal drugs, subsequent encounter    |

**Chronic hepatitis B codes [ICD-10 Code]**

| <b>Code</b> | <b>Description</b>                            |
|-------------|-----------------------------------------------|
| B18.0       | Chronic viral hepatitis B with delta-agent    |
| B18.1       | Chronic viral hepatitis B without delta-agent |

**Chronic hepatitis C codes [ICD-10 Code]**

| <b>Code</b> | <b>Description</b>        |
|-------------|---------------------------|
| B18.2       | Chronic viral hepatitis C |
