# Supplementary material for: Disease burden of primary biliary cholangitis and associated pruritus based on a cross-sectional US claims analysis
Source: PubMed Central journal article supplement — BMJ Open Gastroenterol. 2022 Aug 16;9(1):e000857. doi: 10.1136/bmjgast-2021-000857 (PMC9386220; doi:10.1136/bmjgast-2021-000857), 2022-08-16
Supplement: bmjgast-2021-000857supp002.pdf [file bmjgast-2021-000857supp002.pdf]

## SUPPLEMENTAL MATERIAL

### Supplementary Methods

#### *Mathematical approach for indirect standardisation*

Indirect standardisation generates the expected rate/proportion in a study population if it was subject to the stratum-specific rates/proportions of the standard population. The number of observed events versus the number of expected events can be expressed as a ratio – the standardised rate (or proportion) ratio.

In the context of this study, the study population is defined as all eligible patients meeting the case definition of PBC, while the standard population is defined as all eligible patients who did not meet the case definition of PBC. Strata are defined as groupings based on the age and sex of individuals.

For a study population, the number of expected events ( $d_e$ ) can be calculated as follows:

$$d_e = \sum_{(k, i=1)} n_i R_i$$

$d_e$  = the number of expected events;  $n_i$  = the number of individuals in the  $i^{\text{th}}$  stratum of the study population;  $R_i$  = stratum-specific rate or proportion in the  $i^{\text{th}}$  stratum of the standard population;  $k$  = the number of strata.

The indirect standardised ratio (ISR) is the ratio of the number of observed events ( $d_o$ ) to the number of expected events ( $d_e$ ) in the study population:

$$ISR = d_o/d_e = d_o/\sum_{(k, i=1)} n_i R_i$$

$d_o$  = the number of observed events;  $d_e$  = the number of expected events;  $n_i$  = the number of individuals in the  $i^{\text{th}}$  stratum of the study population;  $R_i$  = stratum-specific rate or proportion in the  $i^{\text{th}}$  stratum of the standard population;  $k$  = the number of strata.

Confidence intervals for the ISR are calculated per Owen's exact Poisson method.<sup>25</sup>

$$ISR_l = \chi^2_{1-\alpha/2, 2d_o} / 2d_e$$

$$ISR_u = \chi^2_{1-\alpha/2, 2(d_o+1)} / 2d_e$$

$ISR_l$  = the lower bound of the confidence interval;  $ISR_u$  = the upper bound of the confidence interval;

$d_o$  = the number of observed events;  $d_e$  = the number of expected events.

## Supplementary Results

**Supplementary Figure 1. Prevalence of prespecified comorbidities among patients in the PBC population (N=1,963) or the PBC-pruritus subpopulation (N=139) relative to the respective non-case populations\***

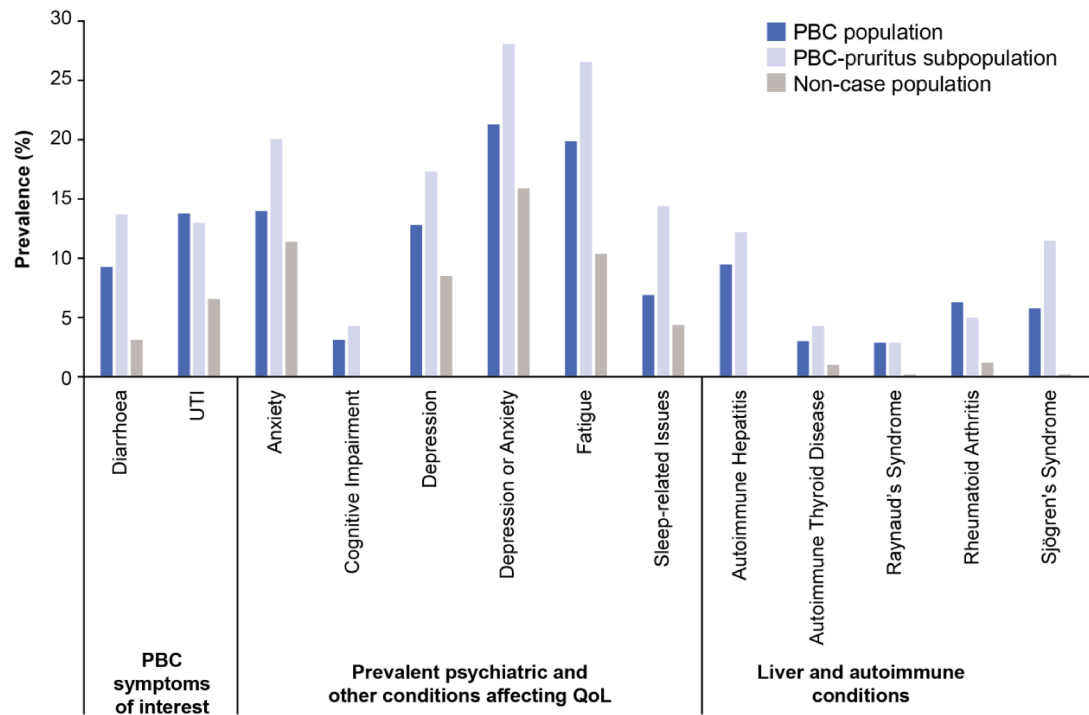

\*N for the non-case population (N=10,245,592), relates to the comparison versus the PBC population not versus the PBC-pruritus population (N=9,984,009)

PBC, primary biliary cholangitis; QoL, quality of life; UTI, urinary tract infection

**Supplementary Table 1.** The 30 most common comorbidities (ICD-10-CM diagnosis codes) in the PBC population and the PBC-pruritus subpopulation

| <b>PBC (N=1,963)</b>                                 | <b>N (%)</b> | <b>PBC-pruritus subpopulation (N=139)</b>               | <b>N (%)</b> |
|------------------------------------------------------|--------------|---------------------------------------------------------|--------------|
| Essential (primary) hypertension                     | 896 (45.6)   | Essential (primary) hypertension                        | 58 (41.7)    |
| Hyperlipidaemia, unspecified                         | 555 (28.3)   | Hypothyroidism, unspecified                             | 41 (29.5)    |
| Gastro-esophageal reflux disease without esophagitis | 493 (25.1)   | Hyperlipidaemia, unspecified                            | 39 (28.1)    |
| Unspecified cirrhosis of liver                       | 473 (24.1)   | Vitamin D deficiency, unspecified                       | 36 (25.9)    |
| Hypothyroidism, unspecified                          | 470 (23.9)   | Gastro-oesophageal reflux disease without oesophagitis  | 33 (23.7)    |
| Biliary cirrhosis, unspecified                       | 433 (22.1)   | Biliary cirrhosis, unspecified                          | 32 (23.0)    |
| Vitamin D deficiency, unspecified                    | 407 (20.7)   | Cough                                                   | 27 (19.4)    |
| Cough                                                | 335 (17.1)   | Anxiety disorder, unspecified                           | 22 (15.8)    |
| Type 2 diabetes mellitus without complications       | 299 (15.2)   | Fatty (change of) liver, not elsewhere classified       | 22 (15.8)    |
| Low back pain                                        | 278 (14.2)   | Cholangitis                                             | 22 (15.8)    |
| Other fatigue                                        | 268 (13.7)   | Anaemia, unspecified                                    | 22 (15.8)    |
| Mixed hyperlipidaemia                                | 268 (13.7)   | Actinic keratosis                                       | 20 (14.4)    |
| Shortness of breath                                  | 244 (12.4)   | Portal hypertension                                     | 19 (13.7)    |
| Unspecified abdominal pain                           | 241 (12.3)   | Low back pain                                           | 19 (13.7)    |
| Age-related osteoporosis*                            | 239 (12.2)   | Abnormal levels of other serum enzymes                  | 19 (13.7)    |
| Anaemia, unspecified                                 | 234 (11.9)   | Abnormal results of liver function studies              | 18 (12.9)    |
| Other specified abnormal findings of blood chemistry | 232 (11.8)   | Type 2 diabetes mellitus without complications          | 18 (12.9)    |
| Abnormal results of liver function studies           | 226 (11.5)   | UTI, site not specified                                 | 18 (12.9)    |
| UTI, site not specified                              | 224 (11.4)   | Autoimmune hepatitis                                    | 17 (12.2)    |
| Abnormal levels of other serum enzymes               | 222 (11.3)   | Acute bronchitis, unspecified                           | 16 (11.5)    |
| Fatty (change of) liver, not elsewhere classified    | 219 (11.2)   | Neoplasm of uncertain or unknown behavior: Skin         | 16 (11.5)    |
| Other seborrheic keratosis                           | 215 (11.0)   | Depressive episode, unspecified                         | 16 (11.5)    |
| Acute upper respiratory infection, unspecified       | 207 (10.5)   | Postmenopausal osteoporosis                             | 16 (11.5)    |
| Chest pain, unspecified                              | 207 (10.5)   | Liver disease, unspecified                              | 15 (10.8)    |
| Age-related nuclear cataract, bilateral              | 202 (10.3)   | Mixed hyperlipidaemia                                   | 15 (10.8)    |
| Dry eye syndrome of bilateral lacrimal glands        | 198 (10.1)   | Obesity, unspecified                                    | 14 (10.1)    |
| Neoplasm of uncertain or unknown behavior: Skin      | 196 (10.0)   | Chronic obstructive pulmonary disease, unspecified      | 12 (8.6)     |
| Cholangitis                                          | 194 (9.9)    | Other specified disorders of bone density and structure | 12 (8.6)     |
| Autoimmune hepatitis                                 | 187 (9.5)    | Pure hypercholesterolaemia                              | 12 (8.6)     |
| Cervicalgia                                          | 186 (9.5)    | Headache                                                | 12 (8.6)     |
|                                                      |              | Hypokalaemia                                            | 12 (8.6)     |
|                                                      |              | Acute pharyngitis, unspecified                          | 12 (8.6)     |
|                                                      |              | Cervicalgia                                             | 12 (8.6)     |
|                                                      |              | Splenomegaly, not elsewhere classified                  | 12 (8.6)     |

\*Without current pathological fracture

ICD-10-CM, International Classification of Diseases, 10<sup>th</sup> Revision, Clinical Modification; PBC, primary biliary cholangitis; UTI, urinary tract infection

**Supplementary Table 2.** The 30 most commonly prescribed medications by category\* in the PBC population and the PBC-pruritus subpopulation

| <b>PBC (N=1,963)</b>                   | <b>N (%)</b> | <b>PBC + coded pruritus (N=139)</b>    | <b>N (%)</b> |
|----------------------------------------|--------------|----------------------------------------|--------------|
| Gallstone solubilizing agents          | 1,724 (87.8) | Gallstone solubilizing agents          | 116 (83.5)   |
| Analgesics                             | 858 (43.7)   | Analgesics                             | 70 (50.4)    |
| Dermatological agents <sup>†</sup>     | 642 (32.7)   | Anxiolytics, sedatives, and hypnotics  | 66 (47.5)    |
| Antihyperlipidemic agents <sup>‡</sup> | 621 (31.6)   | Dermatological agents <sup>†</sup>     | 65 (46.8)    |
| Proton pump inhibitors                 | 598 (30.5)   | Antihyperlipidemic agents <sup>‡</sup> | 53 (38.1)    |
| Adrenal cortical steroids              | 586 (29.9)   | Proton pump inhibitors                 | 51 (36.7)    |
| Antidepressants                        | 575 (29.3)   | Antidepressants                        | 49 (35.3)    |
| Thyroid hormones                       | 539 (27.5)   | Adrenal cortical steroids              | 47 (33.8)    |
| Anxiolytics, sedatives, and hypnotics  | 510 (26.0)   | Antihistamines                         | 43 (30.9)    |
| Penicillins                            | 494 (25.2)   | Thyroid hormones                       | 42 (30.2)    |
| Beta-adrenergic blocking agents        | 431 (22.0)   | Penicillins                            | 37 (26.6)    |
| Macrolide derivatives                  | 412 (21.0)   | Diuretics                              | 34 (24.5)    |
| Diuretics                              | 396 (20.2)   | Antiemetic/antivertigo agents          | 33 (23.7)    |
| Anticonvulsants                        | 380 (19.4)   | Anticonvulsants                        | 32 (23.0)    |
| Ophthalmic preparations                | 358 (18.2)   | Macrolide derivatives                  | 31 (22.3)    |
| Quinolones                             | 352 (17.9)   | Beta-adrenergic blocking agents        | 30 (21.6)    |
| Antiemetic/antivertigo agents          | 339 (17.3)   | Immunosuppressive agents               | 28 (20.1)    |
| Bronchodilators                        | 325 (16.6)   | Antimalarial agents                    | 27 (19.4)    |
| Cephalosporins                         | 317 (16.1)   | Bronchodilators                        | 26 (18.7)    |
| Antimalarial agents                    | 310 (15.8)   | Cephalosporins                         | 24 (17.3)    |
| Calcium channel blocking agents        | 288 (14.7)   | Sex hormones                           | 24 (17.3)    |
| Nasal preparations                     | 272 (13.9)   | Immunostimulants                       | 22 (15.8)    |
| Laxatives                              | 268 (13.7)   | Laxatives                              | 21 (15.1)    |
| Antidiabetic agents                    | 267 (13.6)   | Ophthalmic preparations                | 21 (15.1)    |
| Antirheumatics                         | 266 (13.6)   | Tetracyclines                          | 21 (15.1)    |
| Sex hormones                           | 266 (13.6)   | Vitamins                               | 21 (15.1)    |
| Immunostimulants                       | 259 (13.2)   | Miscellaneous GI agents                | 20 (14.4)    |
| Immunosuppressive agents               | 252 (12.8)   | Quinolones                             | 20 (14.4)    |
| ACE inhibitors                         | 247 (12.6)   | Antifungals                            | 18 (12.9)    |
| Muscle relaxants                       | 239 (12.2)   | Antirheumatics                         | 18 (12.9)    |
|                                        |              | Antiviral agents                       | 18 (12.9)    |
|                                        |              | Muscle relaxants                       | 18 (12.9)    |
|                                        |              | Sulfonamides                           | 18 (12.9)    |
|                                        |              | Vaginal preparations                   | 18 (12.9)    |

\*Medications are grouped according to NDC Multum Level 2 and listed from most to least frequently prescribed.

†Level 2 group ‘dermatological agents’ contains the following topical agents: anti-infectives, steroids, anaesthetics, miscellaneous agents, anti-infectives with steroids, acne agents, antipsoriatics, emollients, antibiotics, antivirals, antifungals

‡Including statins

ACE, angiotensin-converting enzyme; GI, gastrointestinal; NDC, national drug code; PBC, primary biliary cholangitis

Supplementary Table 3. Age-specific estimates of prespecified comorbidities by PBC status

| N (%)                      | Non-case population* |                    |                    |                        |                  | PBC population    |               |               |              |              |
|----------------------------|----------------------|--------------------|--------------------|------------------------|------------------|-------------------|---------------|---------------|--------------|--------------|
|                            | Age group (years)    |                    |                    |                        |                  | Age group (years) |               |               |              |              |
|                            | 18–34                | 35–54              | 55–64              | 65–74                  | ≥75              | 18–34             | 35–54         | 55–64         | 65–74        | ≥75          |
| Source population          | 2,693,650<br>(100)   | 4,071,602<br>(100) | 2,443,349<br>(100) | 568,235<br>(100)       | 468,756<br>(100) | 40<br>(100)       | 584<br>(100)  | 808<br>(100)  | 336<br>(100) | 195<br>(100) |
| UTI                        | 164,926<br>(6.1)     | 227,400<br>(5.6)   | 160,607<br>(6.6)   | 50,456 (8.9)<br>(15.4) | 72,211<br>(15.4) | 3<br>(7.5)        | 80<br>(13.7)  | 93<br>(11.5)  | 58<br>(17.3) | 37<br>(19.0) |
| Rheumatoid arthritis       | 8,078<br>(0.3)       | 41,973 (1.0)       | 42,340 (1.7)       | 14,012 (2.5)           | 12,077 (2.6)     | 0                 | 40<br>(6.9)   | 56<br>(6.9)   | 18<br>(5.4)  | 9<br>(4.6)   |
| Raynaud's syndrome         | 3,909<br>(0.2)       | 10,068 (0.3)       | 6,890<br>(0.3)     | 2,044<br>(0.4)         | 1,422<br>(0.3)   | 0                 | 15<br>(2.6)   | 28<br>(3.5)   | 9<br>(2.7)   | 5<br>(2.6)   |
| Sjögren's syndrome         | 1,764<br>(0.1)       | 9,290<br>(0.2)     | 8,804<br>(0.4)     | 2,694<br>(0.5)         | 1,875<br>(0.4)   | 2<br>(5.0)        | 42<br>(7.2)   | 44<br>(5.5)   | 14<br>(4.2)  | 12<br>(6.2)  |
| SLE                        | 4,411<br>(0.2)       | 13,880 (0.3)       | 8,422<br>(0.3)     | 2,051<br>(0.4)         | 1,132<br>(0.2)   | 0                 | 22<br>(3.8)   | 17<br>(2.1)   | 3<br>(0.9)   | 5<br>(2.6)   |
| Autoimmune thyroid disease | 17,888 (0.7)         | 46,447 (1.1)       | 26,286 (1.1)       | 5,496<br>(1.0)         | 2,951<br>(0.6)   | 2<br>(5.0)        | 25<br>(4.3)   | 19<br>(2.4)   | 12<br>(3.6)  | 1<br>(0.5)   |
| Autoimmune hepatitis       | 431<br>(0.02)        | 1,208 (0.03)       | 1,217<br>(0.1)     | 381<br>(0.1)           | 239<br>(0.1)     | 10<br>(25.0)      | 66<br>(11.3)  | 80<br>(9.9)   | 22<br>(6.6)  | 9<br>(4.6)   |
| Depression or anxiety      | 404,669<br>(15.0)    | 653,326<br>(16.1)  | 379,403<br>(15.5)  | 98,712<br>(17.4)       | 88,704<br>(18.9) | 8<br>(20.0)       | 119<br>(20.4) | 174<br>(21.5) | 85<br>(25.3) | 32<br>(16.4) |
| Depression                 | 205,633<br>(7.6)     | 337,124<br>(8.3)   | 214,302<br>(8.8)   | 58,600<br>(10.3)       | 54,579<br>(11.6) | 6<br>(15.0)       | 62<br>(10.6)  | 112<br>(13.9) | 49<br>(14.6) | 22<br>(11.3) |



|                      |                   |                   |                   |                  |                  |              |               |               |              |              |
|----------------------|-------------------|-------------------|-------------------|------------------|------------------|--------------|---------------|---------------|--------------|--------------|
| Anxiety              | 316,553<br>(11.8) | 475,887<br>(11.7) | 252,219<br>(10.3) | 63,239<br>(11.1) | 54,917<br>(11.7) | 7<br>(17.5)  | 82<br>(14.0)  | 110<br>(13.6) | 56<br>(16.7) | 20<br>(10.3) |
| Sleep-related issues | 63,603 (2.4)      | 187,725<br>(4.6)  | 132,263<br>(5.4)  | 32,173 (5.7)     | 29,536 (6.3)     | 5<br>(12.5)  | 40<br>(6.9)   | 51<br>(6.3)   | 21<br>(6.3)  | 19<br>(9.7)  |
| Pruritus             | 35,244 (1.3)      | 57,802 (1.4)      | 39,861 (1.6)      | 13,010 (2.3)     | 12,231 (2.6)     | 6<br>(15.0)  | 48<br>(8.2)   | 51<br>(6.3)   | 20<br>(6.0)  | 8<br>(4.1)   |
| Diarrhoea            | 83,613 (3.1)      | 112,690<br>(2.8)  | 73,709 (3.0)      | 24,168 (4.3)     | 26,708 (5.7)     | 4<br>(10.0)  | 50<br>(8.6)   | 68<br>(8.4)   | 41<br>(12.2) | 19<br>(9.7)  |
| Fatigue              | 194,643<br>(7.2)  | 440,621<br>(10.8) | 266,746<br>(10.9) | 69,335<br>(12.2) | 96,564<br>(20.6) | 10<br>(25.0) | 127<br>(21.8) | 149<br>(18.4) | 62<br>(18.5) | 42<br>(21.5) |

<sup>†</sup>N for the non-case population (N=10,245,592), relates to the comparison versus the PBC population not versus the PBC-pruritus population (N=9,984,009)

Data shown reflects given conditions with  $\geq 1$  claim(s) during the 2017 calendar year

PBC, primary biliary cholangitis; SLE, systemic lupus erythematosus; UTI, urinary tract infection

**Supplementary File 1. ICD-10 codes for prespecified comorbidities.**
